# Supplementary material for: Academic Tangping scale for college students in China: scale development, validation and application
Source: Sci Rep. 2026 Feb 9;16:7897. doi: 10.1038/s41598-026-38759-2 (PMC12954069; doi:10.1038/s41598-026-38759-2)
Supplement: Supplementary file 1 — Supplementary Material 1 [file 41598_2026_38759_MOESM1_ESM.xlsx]

## Sheet: Sheet1
Gender	BP	Age	Affective1	Affective2	Affective3	Affective4	Affective5	Behavioral1	Behavioral2	Behavioral3	Behavioral4	Behavioral5	Cognitive1	Cognitive2	Cognitive3	Cognitive4	Cognitive5	LyingTendency1	LyingTendency2	LyingTendency3	LyingTendency4	LyingTendency5	LyingTendency6	Education	SumTangping	University
Male	Urban	17	3	2	2	2	2	3	1	3	2	3	2	3	2	1	1	1	1	1	2	1	1	Undergraduate	32	NCUST
Female	Urban	17	3	1	5	3	5	2	2	2	2	2	2	2	2	2	2	2	2	2	2	2	2	Undergraduate	37	NCUST
Male	Rural	17	4	2	4	2	5	3	3	5	3	5	3	4	3	3	5	3	5	5	3	5	4	Undergraduate	54	NCUST
Male	Rural	17	4	4	4	4	4	4	4	4	4	4	2	2	2	2	2	2	2	2	2	2	2	Undergraduate	50	NCUST
Male	Rural	17	4	4	5	5	2	3	2	2	2	3	5	3	2	1	3	5	4	2	3	4	2	Undergraduate	46	NCUST
Male	Rural	17	3	3	3	3	3	2	2	2	2	2	2	2	2	2	2	2	2	2	2	2	2	Undergraduate	35	NCUST
Male	Urban	17	3	2	5	5	4	3	3	3	3	3	3	3	3	3	4	4	4	4	4	4	4	Undergraduate	50	NCUST
Female	Urban	17	4	4	4	4	4	4	3	3	2	3	1	1	1	1	1	1	1	1	1	1	1	Undergraduate	40	NCUST
Female	Rural	17	3	3	4	4	3	3	3	2	2	4	3	2	2	2	2	2	2	1	2	2	1	Undergraduate	42	NCUST
Female	Rural	17	4	2	4	2	4	3	2	4	2	3	3	2	4	3	3	2	3	3	2	4	3	Undergraduate	45	NCUST
Male	Rural	17	3	3	3	3	3	3	3	3	3	3	3	3	3	3	3	4	4	4	4	4	4	Undergraduate	45	NCUST
Male	Urban	18	1	1	1	1	1	1	1	1	1	1	1	1	1	1	1	1	1	1	1	1	1	Undergraduate	15	NCUST
Female	Rural	18	3	3	3	3	3	3	3	3	3	3	3	3	3	3	3	3	3	3	3	3	3	Undergraduate	45	NCUST
Male	Urban	18	4	4	4	4	4	3	3	3	3	3	3	3	3	3	3	4	4	4	4	4	4	Undergraduate	50	NCUST
Male	Rural	18	3	3	3	3	3	3	3	3	3	3	3	3	3	3	3	3	3	2	2	2	2	Undergraduate	45	NCUST
Female	Rural	18	3	3	3	3	3	3	3	3	3	3	3	3	3	3	3	3	3	3	3	3	3	Undergraduate	45	NCUST
Female	Rural	18	3	3	3	3	3	3	3	3	3	3	3	3	3	3	3	3	3	3	3	3	3	Undergraduate	45	NCUST
Female	Rural	18	3	3	3	3	3	3	3	3	3	3	2	2	2	2	2	2	2	2	2	2	2	Undergraduate	40	NCUST
Female	Rural	18	5	5	5	5	5	5	5	5	5	5	5	4	3	4	5	1	1	1	2	3	5	Undergraduate	71	NCUST
Male	Urban	18	3	3	3	3	3	3	3	3	3	3	3	3	3	3	3	3	3	3	3	3	3	Undergraduate	45	NCUST
Male	Rural	18	3	3	5	5	4	4	4	4	4	4	3	2	2	2	2	2	2	2	2	2	2	Undergraduate	51	NCUST
Male	Rural	18	2	2	2	2	2	2	2	2	2	2	2	2	2	2	2	1	1	1	1	1	1	Undergraduate	30	NCUST
Female	Rural	18	1	1	5	5	5	3	5	3	3	3	1	1	1	1	1	1	1	1	1	1	1	Undergraduate	39	NCUST
Female	Urban	18	4	4	4	4	4	3	3	2	2	4	2	4	2	2	2	2	2	2	1	1	1	Undergraduate	46	NCUST
Female	Rural	18	4	4	4	4	4	4	4	4	4	4	4	4	4	4	4	3	3	3	3	3	3	Undergraduate	60	NCUST
Male	Rural	18	3	2	2	2	2	3	3	3	3	3	3	3	3	3	3	2	2	2	2	2	2	Undergraduate	41	NCUST
Male	Rural	18	4	4	4	4	4	3	3	3	3	3	3	3	3	3	3	2	2	2	2	2	2	Undergraduate	50	NCUST
Male	Rural	18	3	1	4	5	5	2	2	2	1	3	1	1	1	1	1	1	1	1	1	1	1	Undergraduate	33	NCUST
Female	Urban	18	3	4	4	3	2	4	4	4	4	2	2	1	1	3	2	1	2	2	3	2	3	Undergraduate	43	NCUST
Female	Rural	18	3	3	3	3	3	3	3	3	3	3	3	3	3	3	3	3	3	3	3	3	3	Undergraduate	45	NCUST
Male	Rural	18	2	2	2	2	3	3	3	3	3	3	2	2	2	2	2	4	4	2	3	3	3	Undergraduate	36	NCUST
Male	Urban	18	5	3	5	5	5	3	2	2	3	4	2	1	1	1	1	1	1	1	1	1	1	Undergraduate	43	NCUST
Male	Urban	18	4	3	4	2	4	4	2	4	3	3	4	5	4	3	4	2	2	3	4	3	1	Undergraduate	53	NCUST
Female	Rural	18	3	3	3	3	3	3	3	3	3	3	3	3	3	3	3	3	3	3	3	3	3	Undergraduate	45	NCUST
Female	Rural	18	4	4	4	4	5	2	2	2	3	3	2	2	2	2	2	2	2	2	2	3	2	Undergraduate	43	NCUST
Male	Urban	18	3	3	3	3	3	4	4	4	4	4	3	3	3	3	3	4	4	4	4	4	4	Undergraduate	50	NCUST
Male	Urban	18	4	3	4	2	2	3	3	4	3	3	4	5	2	2	2	3	2	1	1	3	2	Undergraduate	46	NCUST
Male	Rural	18	3	2	2	1	1	1	1	1	2	1	1	2	1	1	2	2	1	1	2	1	1	Undergraduate	22	NCUST
Female	Rural	18	3	3	3	3	3	3	3	3	3	3	3	3	3	3	3	1	1	1	1	1	1	Undergraduate	45	NCUST
Female	Urban	18	4	5	5	5	5	2	2	1	2	3	1	2	1	1	1	1	1	1	2	2	1	Undergraduate	40	NCUST
Male	Rural	18	5	5	5	5	5	3	3	3	3	3	3	3	3	3	3	1	1	1	1	1	1	Undergraduate	55	NCUST
Male	Rural	18	3	3	3	3	3	3	3	3	3	4	3	3	3	3	3	2	2	2	2	2	2	Undergraduate	46	NCUST
Female	Rural	18	4	3	4	4	4	2	2	3	3	3	3	3	2	1	2	2	2	1	2	3	3	Undergraduate	43	NCUST
Male	Rural	18	1	5	1	5	5	3	1	1	5	4	4	4	4	4	1	4	4	1	3	4	1	Undergraduate	48	NCUST
Male	Urban	18	5	5	5	5	5	5	5	5	5	5	1	1	1	1	1	1	1	1	1	1	1	Undergraduate	55	NCUST
Male	Rural	18	3	3	3	3	3	3	3	3	3	3	3	3	3	3	3	3	3	3	3	3	3	Undergraduate	45	NCUST
Female	Urban	18	3	2	4	4	4	3	3	3	3	3	3	3	3	3	3	2	2	2	2	2	2	Undergraduate	47	NCUST
Female	Urban	18	2	2	2	4	3	1	1	1	1	3	1	1	1	1	1	1	1	1	1	1	3	Undergraduate	25	NCUST
Male	Rural	18	3	3	3	3	3	3	3	3	3	3	3	3	3	3	3	3	3	3	3	3	3	Undergraduate	45	NCUST
Male	Urban	18	3	3	3	3	3	3	3	3	3	2	3	3	3	3	3	3	2	2	2	2	2	Undergraduate	44	NCUST
Female	Rural	18	5	5	5	4	2	2	2	3	3	2	1	1	1	1	1	2	1	1	1	2	1	Undergraduate	38	NCUST
Male	Rural	18	3	2	2	4	4	2	3	2	2	4	1	1	1	1	1	1	1	1	1	1	2	Undergraduate	33	NCUST
Male	Rural	18	2	2	4	2	2	2	2	2	2	3	1	1	1	1	1	1	4	1	1	1	2	Undergraduate	28	NCUST
Male	Rural	18	3	3	4	4	3	4	4	3	3	4	2	2	2	2	2	3	2	2	2	2	2	Undergraduate	45	NCUST
Male	Rural	18	4	2	3	3	4	2	2	2	2	2	2	4	2	2	2	2	3	2	2	2	1	Undergraduate	38	NCUST
Male	Rural	18	5	1	3	2	5	5	4	3	5	5	5	4	3	2	5	5	4	5	2	5	4	Undergraduate	57	NCUST
Female	Urban	18	4	1	3	1	1	1	1	1	1	2	1	2	1	1	1	2	1	1	1	1	1	Undergraduate	22	NCUST
Male	Urban	18	2	2	4	4	4	2	2	4	3	4	2	2	2	2	2	2	2	2	2	2	2	Undergraduate	41	NCUST
Male	Rural	18	4	4	4	4	4	3	4	4	3	4	2	2	2	2	2	3	2	1	1	1	1	Undergraduate	48	NCUST
Male	Rural	18	3	4	2	2	3	3	3	3	4	3	3	2	4	3	3	2	3	3	2	5	4	Undergraduate	45	NCUST
Male	Rural	18	3	2	3	5	5	4	3	3	3	3	3	3	3	3	3	2	2	3	1	3	3	Undergraduate	49	NCUST
Male	Rural	18	1	1	1	1	1	1	1	1	1	1	1	1	1	1	1	1	1	1	1	1	1	Undergraduate	15	NCUST
Male	Rural	18	4	3	5	3	3	4	2	3	3	4	2	2	2	1	2	3	2	1	1	2	3	Undergraduate	43	NCUST
Female	Rural	18	4	4	4	4	4	2	2	2	2	3	1	1	1	1	1	1	1	1	1	1	1	Undergraduate	36	NCUST
Female	Rural	18	3	3	3	3	3	2	2	2	2	2	2	2	2	2	2	2	2	2	2	2	2	Undergraduate	35	NCUST
Female	Rural	18	2	2	3	4	4	2	2	2	2	2	2	2	2	2	2	2	2	2	2	2	2	Undergraduate	35	NCUST
Male	Urban	18	3	3	3	3	3	3	3	4	4	3	3	3	3	2	3	3	3	2	3	2	3	Undergraduate	46	NCUST
Male	Rural	18	4	3	3	4	3	4	4	4	4	3	4	3	3	3	3	4	4	4	4	4	4	Undergraduate	52	NCUST
Female	Rural	18	3	3	4	3	3	3	3	3	3	3	2	2	2	2	2	3	2	2	2	2	2	Undergraduate	41	NCUST
Male	Rural	18	3	3	3	3	3	4	4	4	3	3	1	1	1	2	4	3	2	2	2	2	4	Undergraduate	42	NCUST
Male	Rural	18	3	4	4	4	4	3	4	4	4	4	2	2	2	2	2	2	2	2	2	2	2	Undergraduate	48	NCUST
Male	Urban	18	3	2	3	2	3	2	2	1	2	3	1	1	2	1	1	2	1	1	1	1	2	Undergraduate	29	NCUST
Male	Rural	18	3	4	4	3	3	4	4	4	4	4	4	3	3	2	2	2	3	2	3	2	2	Undergraduate	51	NCUST
Female	Rural	18	4	3	4	3	4	3	3	3	3	3	4	4	4	4	3	2	3	2	2	2	2	Undergraduate	52	NCUST
Male	Rural	18	4	2	3	4	5	3	2	3	3	4	1	1	3	2	2	2	2	2	2	2	2	Undergraduate	42	NCUST
Male	Urban	18	3	1	3	1	3	2	2	4	3	3	4	4	3	2	2	2	2	2	2	2	1	Undergraduate	40	NCUST
Male	Rural	18	1	3	3	2	3	1	1	1	1	1	1	1	1	1	1	4	2	2	4	2	4	Undergraduate	22	NCUST
Male	Rural	18	1	2	5	5	5	5	2	5	2	5	2	5	5	5	5	5	2	5	2	2	5	Undergraduate	59	NCUST
Female	Rural	18	4	4	4	4	4	3	3	3	3	3	2	2	2	2	2	2	2	2	2	2	2	Undergraduate	45	NCUST
Male	Rural	18	4	4	4	4	4	2	2	2	4	4	2	1	1	1	1	1	1	1	1	1	1	Undergraduate	40	NCUST
Male	Rural	18	3	3	3	3	3	4	4	2	3	4	3	4	2	4	3	1	1	1	1	1	1	Undergraduate	48	NCUST
Female	Urban	18	3	3	3	3	3	3	3	3	3	3	3	3	3	3	3	2	2	2	2	2	2	Undergraduate	45	NCUST
Male	Rural	18	3	2	4	3	3	2	2	2	2	3	2	2	2	2	2	2	2	2	2	1	2	Undergraduate	36	NCUST
Female	Rural	18	3	2	5	4	5	2	2	2	2	3	3	2	2	2	2	2	2	1	2	2	2	Undergraduate	41	NCUST
Male	Rural	18	3	3	4	4	4	4	3	4	3	4	3	2	2	2	2	2	2	2	2	2	2	Undergraduate	47	NCUST
Female	Rural	18	3	1	2	2	3	2	2	2	2	2	2	2	3	2	1	2	2	2	2	2	1	Undergraduate	31	NCUST
Female	Rural	18	3	3	3	2	3	2	2	2	2	2	2	2	2	2	2	2	2	2	2	2	2	Undergraduate	34	NCUST
Male	Urban	18	4	2	2	3	3	3	3	3	3	3	4	4	4	3	3	2	2	2	2	2	2	Undergraduate	47	NCUST
Male	Urban	18	3	2	4	4	4	2	2	2	2	2	2	2	2	2	2	2	1	1	2	1	1	Undergraduate	37	NCUST
Male	Rural	18	3	3	4	4	4	2	3	2	2	4	2	3	2	1	2	2	2	2	2	3	2	Undergraduate	41	NCUST
Female	Rural	18	3	2	4	2	2	2	2	3	3	2	2	2	2	2	2	2	1	2	3	2	2	Undergraduate	35	NCUST
Male	Rural	18	3	3	3	3	3	3	3	3	3	3	2	2	2	2	2	2	2	2	2	2	2	Undergraduate	40	NCUST
Male	Urban	18	3	3	3	3	3	3	3	3	3	3	3	3	3	3	3	3	3	3	3	3	3	Undergraduate	45	NCUST
Female	Rural	18	2	3	2	2	1	2	3	3	4	3	2	2	2	2	3	4	3	2	1	2	3	Undergraduate	36	NCUST
Male	Urban	18	4	4	5	4	4	3	2	2	2	2	2	3	5	2	3	1	3	2	4	4	2	Undergraduate	47	NCUST
Male	Rural	18	4	4	4	4	3	2	3	3	3	3	2	2	1	1	1	2	2	2	2	1	1	Undergraduate	40	NCUST
Male	Rural	18	4	2	4	4	3	2	2	3	1	4	2	3	1	2	3	1	2	2	3	2	4	Undergraduate	40	NCUST
Male	Rural	18	5	5	5	4	4	3	2	3	2	2	1	1	1	1	1	1	1	1	1	1	1	Undergraduate	40	NCUST
Male	Urban	18	3	3	3	3	3	3	3	3	3	3	3	3	3	3	3	3	3	3	3	3	3	Undergraduate	45	NCUST
Male	Rural	18	3	3	4	5	4	2	3	4	3	4	2	1	1	1	1	2	1	1	1	1	2	Undergraduate	41	NCUST
Female	Urban	18	5	2	5	5	3	3	2	2	2	4	1	1	1	1	1	1	1	1	1	1	2	Undergraduate	38	NCUST
Male	Rural	18	3	3	3	3	3	3	3	3	3	3	2	2	2	3	4	3	3	3	3	3	3	Undergraduate	43	NCUST
Male	Urban	18	5	1	5	5	5	1	1	1	1	1	1	3	1	1	1	1	1	1	1	1	1	Undergraduate	33	NCUST
Male	Rural	18	4	4	4	4	4	4	4	4	4	4	4	4	3	4	4	4	5	4	5	4	5	Undergraduate	59	NCUST
Male	Rural	18	3	3	3	3	3	3	3	3	3	3	3	3	3	3	3	3	3	3	3	3	3	Undergraduate	45	NCUST
Male	Rural	18	4	4	4	4	4	4	4	4	4	4	4	4	4	4	4	4	4	4	4	4	4	Undergraduate	60	NCUST
Male	Rural	18	3	3	4	4	3	3	3	3	3	3	3	3	3	3	3	3	3	3	3	3	3	Undergraduate	47	NCUST
Female	Urban	18	3	3	3	3	3	3	3	3	3	3	2	2	2	2	2	2	2	2	2	2	2	Undergraduate	40	NCUST
Female	Rural	18	3	3	3	3	3	3	4	4	3	3	3	3	4	3	3	4	4	3	2	1	2	Undergraduate	48	NCUST
Male	Rural	18	3	2	2	1	2	2	1	2	3	3	2	1	2	1	1	2	1	1	1	1	1	Undergraduate	28	NCUST
Male	Rural	18	1	2	3	4	5	5	4	3	2	1	1	2	3	4	5	1	2	3	4	5	5	Undergraduate	45	NCUST
Female	Rural	18	3	3	3	3	3	3	3	3	3	3	2	2	2	2	2	2	2	2	2	2	2	Undergraduate	40	NCUST
Male	Urban	18	1	1	1	1	1	3	3	3	3	3	3	3	3	3	3	4	3	2	4	3	4	Undergraduate	35	NCUST
Male	Rural	18	1	1	1	3	4	1	4	1	4	3	1	4	4	3	1	3	2	4	3	1	4	Undergraduate	36	NCUST
Male	Rural	18	4	4	4	4	4	3	3	3	3	3	3	3	3	3	3	2	2	2	3	2	3	Undergraduate	50	NCUST
Male	Rural	18	4	2	4	4	4	2	3	4	2	4	2	4	2	2	2	2	2	1	2	1	1	Undergraduate	45	NCUST
Male	Rural	18	3	3	5	4	3	4	4	4	4	4	4	4	2	2	2	2	3	2	2	1	3	Undergraduate	52	NCUST
Female	Rural	19	3	3	3	3	3	2	3	3	3	3	3	2	2	2	2	2	3	2	2	2	2	Undergraduate	40	NCUST
Female	Rural	19	3	3	3	4	4	2	2	4	4	4	3	2	2	2	2	2	2	2	3	3	2	Undergraduate	44	NCUST
Male	Rural	19	3	3	3	3	3	3	3	3	3	3	3	3	3	3	3	3	3	3	3	3	3	Undergraduate	45	NCUST
Male	Rural	19	3	3	3	3	3	2	2	2	2	2	3	3	2	2	3	3	3	3	3	3	3	Undergraduate	38	NCUST
Female	Rural	19	3	2	3	3	2	2	2	3	2	3	2	2	2	2	2	2	2	2	2	2	2	Undergraduate	35	NCUST
Female	Rural	19	3	3	3	3	3	3	3	3	3	3	3	3	3	3	3	2	2	2	3	2	3	Undergraduate	45	NCUST
Male	Rural	19	2	2	2	2	2	2	2	2	2	2	2	2	2	2	2	1	1	1	1	1	3	Undergraduate	30	NCUST
Male	Rural	19	3	3	3	3	3	3	3	3	3	3	3	2	2	2	2	2	2	2	2	2	2	Undergraduate	41	NCUST
Male	Urban	19	3	2	4	4	4	4	3	2	3	4	4	3	4	2	2	4	3	3	3	3	2	Undergraduate	48	NCUST
Female	Urban	19	2	2	3	3	4	3	2	2	2	2	2	2	2	2	2	2	2	2	2	3	2	Undergraduate	35	NCUST
Male	Rural	19	4	4	3	4	2	4	4	4	3	2	4	3	4	2	4	3	3	2	3	3	4	Undergraduate	51	NCUST
Female	Rural	19	3	3	3	3	3	2	2	2	2	3	2	2	2	2	2	3	3	2	3	3	2	Undergraduate	36	NCUST
Female	Rural	19	4	4	4	3	4	4	4	4	4	4	4	2	2	2	2	2	2	1	2	3	2	Undergraduate	51	NCUST
Female	Urban	19	2	4	4	5	5	4	3	4	3	4	4	3	2	2	2	4	5	2	2	2	2	Undergraduate	51	NCUST
Male	Rural	19	1	1	1	1	1	1	1	1	1	1	1	1	1	1	1	1	1	1	1	1	1	Undergraduate	15	NCUST
Male	Urban	19	5	5	5	5	5	1	1	1	1	1	1	1	1	1	1	1	1	1	1	1	1	Undergraduate	35	NCUST
Female	Rural	19	4	3	4	4	2	2	2	3	3	3	4	3	3	2	2	3	2	2	2	2	2	Undergraduate	44	NCUST
Male	Rural	19	3	3	3	3	3	4	4	3	3	4	3	3	3	3	3	3	3	3	3	3	3	Undergraduate	48	NCUST
Male	Urban	19	3	4	4	3	3	4	4	4	4	3	3	3	4	3	4	2	1	1	2	1	2	Undergraduate	53	NCUST
Male	Urban	19	3	3	2	3	4	3	2	3	4	3	2	3	4	3	2	3	2	3	4	3	2	Undergraduate	44	NCUST
Female	Rural	19	5	5	5	5	5	5	5	5	4	5	2	3	2	2	1	2	2	4	4	5	5	Undergraduate	59	NCUST
Male	Rural	19	4	2	4	4	5	3	2	3	1	2	3	3	2	2	2	1	1	1	1	1	1	Undergraduate	42	NCUST
Male	Urban	19	2	2	2	2	2	3	4	4	4	3	2	2	2	2	3	2	2	2	2	2	2	Undergraduate	39	NCUST
Male	Rural	19	1	1	1	1	1	1	1	1	1	1	1	1	1	1	1	1	1	1	1	1	1	Undergraduate	15	NCUST
Male	Rural	19	4	2	4	4	5	2	2	4	4	4	2	2	2	2	2	2	2	1	2	2	2	Undergraduate	45	NCUST
Male	Urban	19	4	3	4	4	3	5	4	4	5	4	4	3	2	1	3	2	2	2	3	3	2	Undergraduate	53	NCUST
Male	Rural	19	4	4	5	4	4	5	4	5	4	5	3	3	1	1	1	1	1	1	3	1	1	Undergraduate	53	NCUST
Male	Urban	19	4	4	5	5	5	4	4	4	4	4	2	2	2	2	2	3	2	2	2	2	3	Undergraduate	53	NCUST
Female	Rural	19	5	3	5	1	4	5	5	5	5	5	3	5	5	5	5	3	3	3	3	3	3	Undergraduate	66	NCUST
Male	Urban	19	4	3	4	4	4	2	2	2	2	3	1	1	1	1	1	1	1	1	1	1	2	Undergraduate	35	NCUST
Female	Rural	19	1	1	1	1	1	1	1	1	1	1	1	1	1	1	1	1	1	1	1	1	1	Undergraduate	15	NCUST
Female	Rural	19	3	3	3	3	2	3	3	4	4	3	4	4	4	3	3	3	3	3	3	2	2	Undergraduate	49	NCUST
Male	Rural	19	3	3	4	3	4	2	2	2	2	1	1	2	2	2	1	2	1	1	1	1	2	Undergraduate	34	Others
Male	Rural	19	4	3	4	4	4	3	3	4	4	4	2	2	2	2	2	4	2	2	2	2	3	Undergraduate	47	NCUST
Male	Rural	19	4	4	3	2	4	4	4	3	3	5	4	4	3	4	3	5	1	1	1	1	4	Undergraduate	54	NCUST
Male	Rural	19	2	2	4	2	4	4	2	3	2	4	3	3	2	2	2	2	2	2	2	2	3	Undergraduate	41	NCUST
Male	Urban	19	3	2	4	4	4	2	2	5	4	4	2	1	1	1	1	1	1	1	1	1	2	Undergraduate	40	NCUST
Male	Rural	19	4	4	4	4	4	4	4	4	4	4	4	4	4	4	4	4	4	4	4	4	4	Undergraduate	60	NCUST
Male	Rural	19	2	4	4	4	4	4	4	4	4	4	3	2	2	2	2	4	2	2	2	2	4	Undergraduate	49	NCUST
Male	Rural	19	3	2	3	3	3	4	3	2	3	3	4	3	3	3	3	3	3	3	3	3	3	Undergraduate	45	NCUST
Male	Rural	19	3	1	3	3	4	2	1	1	2	2	1	1	2	1	2	1	1	2	1	1	2	Undergraduate	29	NCUST
Male	Rural	19	4	4	4	4	4	4	4	4	4	4	4	2	2	4	5	3	2	3	3	3	5	Undergraduate	57	NCUST
Male	Urban	19	2	2	4	4	4	4	3	4	3	3	2	2	2	2	2	2	2	2	2	2	2	Undergraduate	43	NCUST
Male	Rural	19	2	2	3	2	2	2	3	2	3	3	2	3	2	3	2	3	2	4	3	3	4	Undergraduate	36	NCUST
Male	Rural	19	2	3	3	3	3	2	2	2	2	2	2	2	2	2	2	2	2	3	3	2	2	Undergraduate	34	NCUST
Male	Urban	19	3	2	3	3	2	4	3	4	2	2	3	2	2	2	2	2	2	2	2	2	2	Undergraduate	39	NCUST
Male	Rural	19	3	4	4	4	4	3	3	3	3	3	3	3	3	3	3	3	3	3	3	3	3	Undergraduate	49	NCUST
Female	Rural	19	1	1	1	1	1	1	1	1	1	1	1	1	1	1	1	1	1	1	1	1	1	Undergraduate	15	NCUST
Male	Rural	19	3	3	3	3	3	3	3	3	3	3	3	3	3	3	3	2	2	2	2	2	2	Undergraduate	45	NCUST
Male	Rural	19	4	3	4	4	5	4	3	4	3	3	3	2	3	2	3	4	5	3	4	3	4	Undergraduate	50	NCUST
Male	Urban	19	5	5	5	4	4	4	4	4	5	4	5	5	4	4	4	5	5	4	4	5	5	Undergraduate	66	NCUST
Female	Rural	19	5	4	3	4	5	2	4	3	4	3	4	3	4	4	3	4	3	4	4	4	3	Undergraduate	55	NCUST
Female	Urban	19	2	4	2	4	2	2	3	2	4	2	2	3	2	4	3	2	4	2	3	2	2	Undergraduate	41	NCUST
Male	Rural	19	4	3	3	3	2	4	3	3	3	3	3	3	3	3	2	3	3	2	2	2	2	Undergraduate	45	NCUST
Male	Urban	19	3	3	3	3	3	3	3	3	3	3	2	2	2	2	2	2	2	2	2	2	2	Undergraduate	40	NCUST
Male	Urban	19	5	5	5	5	5	4	4	5	2	5	1	1	1	1	1	2	2	2	2	4	2	Undergraduate	50	NCUST
Male	Rural	19	2	1	1	1	1	1	3	4	5	2	3	2	1	4	4	4	2	1	1	2	1	Undergraduate	35	NCUST
Female	Rural	19	4	4	4	4	3	4	4	3	3	3	3	3	3	3	3	3	3	3	3	3	3	Undergraduate	51	NCUST
Female	Rural	19	3	3	3	3	3	3	3	3	3	3	3	3	3	3	3	2	2	2	2	2	2	Undergraduate	45	NCUST
Male	Rural	19	3	3	3	3	3	3	3	3	3	3	3	3	3	3	3	3	3	3	3	3	3	Undergraduate	45	NCUST
Female	Rural	19	4	5	5	4	1	4	4	3	2	4	2	5	4	2	3	1	3	4	3	2	3	Undergraduate	52	NCUST
Female	Rural	19	3	3	3	3	3	3	3	3	3	3	3	3	3	3	3	3	3	3	3	3	3	Undergraduate	45	NCUST
Female	Urban	19	5	5	5	5	5	5	5	5	5	5	5	5	5	5	5	5	5	5	5	5	5	Undergraduate	75	Others
Male	Rural	19	4	3	4	3	3	4	3	3	4	3	4	3	4	3	4	4	3	4	3	4	3	Undergraduate	52	NCUST
Male	Urban	19	4	2	4	2	2	2	2	2	2	3	2	2	2	2	2	1	1	1	1	1	1	Undergraduate	35	NCUST
Male	Rural	19	2	2	3	3	4	2	2	2	2	2	2	2	2	2	2	2	2	2	2	2	2	Undergraduate	34	NCUST
Female	Rural	19	5	3	4	4	3	3	4	2	3	2	2	1	1	2	1	2	3	2	2	2	1	Undergraduate	40	NCUST
Female	Urban	19	4	3	4	3	3	3	3	3	3	3	3	3	3	3	3	2	2	2	2	2	2	Undergraduate	47	NCUST
Male	Urban	19	3	3	3	3	3	3	3	3	3	3	3	3	3	3	3	3	3	3	3	3	3	Undergraduate	45	NCUST
Male	Urban	19	4	4	4	4	4	4	4	4	4	4	4	4	4	4	4	4	4	4	4	4	4	Undergraduate	60	Others
Female	Rural	19	3	3	3	3	3	3	3	3	3	3	3	3	3	3	3	4	4	4	4	4	4	Undergraduate	45	NCUST
Female	Urban	19	3	1	2	1	1	1	1	2	3	2	2	1	1	1	1	1	1	1	1	2	1	Undergraduate	23	NCUST
Female	Urban	20	1	3	3	2	3	4	2	4	3	4	3	4	2	3	4	3	4	3	4	2	4	Undergraduate	45	NCUST
Male	Rural	20	5	5	5	5	5	5	5	5	5	5	5	5	5	5	5	5	5	5	5	5	5	Undergraduate	75	NCUST
Male	Rural	20	3	3	3	4	3	2	2	3	2	4	2	2	2	2	2	2	2	2	2	2	2	Undergraduate	39	NCUST
Female	Rural	20	4	3	4	3	4	4	3	2	2	3	3	2	1	1	1	2	2	1	2	1	1	Undergraduate	40	NCUST
Male	Rural	20	3	3	3	3	4	3	3	3	3	3	3	3	3	3	4	4	4	4	4	4	3	Undergraduate	47	NCUST
Female	Rural	20	3	2	4	2	3	2	2	2	2	2	2	2	3	2	2	2	2	2	2	3	2	Undergraduate	35	NCUST
Male	Urban	20	3	3	3	3	3	3	3	2	2	2	2	2	2	2	2	2	2	2	2	2	2	Undergraduate	37	NCUST
Male	Rural	20	2	2	2	2	2	2	2	2	2	2	2	2	2	2	3	2	2	2	2	2	2	Undergraduate	31	NCUST
Male	Urban	20	3	3	2	3	3	3	3	3	3	3	3	3	2	2	2	3	4	2	2	3	2	Undergraduate	41	NCUST
Male	Urban	20	4	4	4	4	4	4	3	3	3	4	3	3	3	2	3	3	2	2	2	2	2	Undergraduate	51	NCUST
Male	Rural	20	4	4	4	4	4	4	4	4	4	4	4	4	4	4	4	4	4	4	4	4	4	Undergraduate	60	NCUST
Male	Rural	20	4	3	5	4	5	4	3	4	2	5	2	1	2	1	2	2	1	2	3	1	4	Undergraduate	47	NCUST
Male	Rural	20	3	2	4	3	3	4	4	5	4	5	2	2	1	1	2	3	2	2	4	3	3	Undergraduate	45	NCUST
Male	Rural	20	1	1	1	1	1	1	1	1	1	1	1	1	1	1	1	1	1	1	1	1	1	Undergraduate	15	NCUST
Male	Urban	20	3	3	3	3	3	3	3	3	3	3	3	3	3	3	3	1	1	1	1	1	1	Undergraduate	45	NCUST
Male	Rural	20	2	1	2	2	1	4	2	2	3	5	2	5	4	2	5	2	3	2	3	4	3	Undergraduate	42	NCUST
Male	Rural	20	5	5	5	5	5	5	5	5	5	5	5	4	5	5	5	5	4	5	5	5	5	Undergraduate	74	NCUST
Male	Rural	20	5	5	5	5	5	3	1	1	1	1	1	1	1	1	1	1	1	1	1	1	1	Undergraduate	37	NCUST
Male	Rural	20	4	3	4	4	4	4	4	4	4	4	3	4	2	2	2	2	2	2	2	2	3	Undergraduate	52	NCUST
Female	Rural	20	2	3	3	2	3	3	3	3	3	3	3	2	2	3	2	3	2	3	2	3	2	Undergraduate	40	NCUST
Male	Rural	20	3	4	4	4	4	4	4	4	4	4	1	3	2	1	2	4	3	3	3	4	4	Undergraduate	48	NCUST
Female	Rural	20	4	2	3	4	3	2	2	3	4	4	2	2	2	2	2	2	2	2	3	2	2	Undergraduate	41	NCUST
Male	Rural	20	3	3	3	3	3	3	3	3	3	3	3	3	3	3	3	3	3	3	3	3	3	Undergraduate	45	NCUST
Male	Urban	20	3	4	3	3	3	3	4	2	3	3	4	2	2	2	2	3	3	3	3	3	3	Undergraduate	43	NCUST
Male	Urban	20	3	4	3	2	3	4	3	2	3	4	3	2	3	4	3	3	4	3	2	3	4	Undergraduate	46	NCUST
Male	Urban	20	5	5	5	5	5	5	5	5	5	5	5	5	5	5	5	5	5	5	5	5	5	Undergraduate	75	NCUST
Male	Rural	20	2	3	4	4	4	4	4	4	4	4	2	3	2	2	2	2	2	2	3	2	3	Undergraduate	48	NCUST
Male	Rural	20	1	1	1	1	1	1	1	1	1	1	1	1	1	1	1	1	1	1	1	1	1	Undergraduate	15	NCUST
Male	Rural	20	4	3	3	4	4	5	4	5	5	5	4	5	4	2	4	3	3	3	3	4	4	Undergraduate	61	NCUST
Male	Rural	20	3	3	3	3	3	3	3	3	3	3	3	3	3	3	3	2	2	2	2	2	2	Undergraduate	45	NCUST
Male	Urban	20	2	4	4	4	4	3	3	2	2	2	2	3	2	2	2	3	2	2	2	2	2	Undergraduate	41	NCUST
Male	Urban	20	3	3	3	3	3	2	2	2	2	2	2	2	2	2	2	3	3	3	3	3	3	Undergraduate	35	NCUST
Male	Rural	20	4	4	4	4	4	5	5	5	5	5	5	5	5	5	5	5	5	4	4	4	4	Undergraduate	70	NCUST
Female	Rural	20	3	3	3	3	3	3	4	4	4	4	2	2	2	2	2	2	2	2	2	2	3	Undergraduate	44	NCUST
Male	Rural	20	5	5	5	5	5	5	5	5	5	5	2	2	2	2	2	1	1	1	3	2	4	Undergraduate	60	NCUST
Male	Rural	20	2	2	2	2	2	2	2	2	2	2	2	2	2	2	2	2	2	2	2	2	2	Undergraduate	30	NCUST
Male	Rural	20	3	4	4	4	4	5	5	5	5	5	4	4	5	5	5	5	5	5	1	3	5	Undergraduate	67	NCUST
Male	Urban	20	3	3	4	4	4	2	2	2	3	2	3	2	2	2	2	2	2	2	2	2	2	Undergraduate	40	NCUST
Male	Rural	20	2	5	4	4	4	2	2	3	3	4	2	3	2	1	1	3	1	2	2	1	2	Undergraduate	42	NCUST
Female	Rural	20	5	5	5	3	4	4	3	4	4	5	4	2	4	3	4	2	2	2	1	3	4	Undergraduate	59	NCUST
Female	Rural	20	3	3	3	3	3	3	3	3	3	3	3	3	3	3	3	2	2	2	2	2	2	Undergraduate	45	NCUST
Male	Rural	20	3	3	3	3	3	2	2	2	2	2	2	2	1	2	2	2	2	2	2	2	2	Undergraduate	34	NCUST
Male	Urban	20	5	5	5	5	5	5	5	5	5	5	5	5	5	5	5	5	5	5	5	5	5	Undergraduate	75	NCUST
Female	Rural	20	5	5	5	4	5	5	4	5	5	5	5	4	5	5	5	5	5	5	5	5	5	Undergraduate	72	NCUST
Female	Rural	20	5	5	4	5	5	5	5	5	4	5	5	5	5	5	5	5	5	4	5	5	5	Undergraduate	73	NCUST
Male	Rural	20	5	5	5	5	5	5	5	5	5	5	5	5	5	5	5	5	5	5	5	5	5	Undergraduate	75	NCUST
Male	Rural	20	3	3	3	3	3	3	3	3	3	3	3	3	3	3	3	4	4	4	4	4	4	Undergraduate	45	NCUST
Male	Rural	20	3	3	3	3	3	4	4	4	4	4	4	4	4	4	4	3	3	3	3	3	3	Undergraduate	55	NCUST
Male	Rural	20	4	4	4	4	4	4	4	4	4	4	4	4	4	4	4	3	3	3	3	3	3	Undergraduate	60	NCUST
Male	Rural	20	3	3	3	3	3	3	3	3	3	3	3	3	3	3	3	1	1	1	1	1	1	Undergraduate	45	NCUST
Female	Rural	20	3	3	3	4	4	3	4	3	3	2	2	4	4	3	3	2	4	3	3	3	3	Undergraduate	48	NCUST
Female	Rural	20	4	4	4	4	4	4	4	4	4	4	4	4	4	4	4	4	4	4	4	4	4	Undergraduate	60	NCUST
Male	Urban	20	5	5	5	5	5	5	5	5	5	5	5	5	5	5	5	5	5	5	5	5	5	Undergraduate	75	NCUST
Male	Rural	20	2	3	3	3	3	4	4	4	4	4	3	3	3	3	3	3	3	3	3	3	3	Undergraduate	49	NCUST
Male	Rural	20	3	3	3	3	3	3	3	3	3	3	3	3	3	3	3	2	2	2	2	2	2	Undergraduate	45	NCUST
Male	Rural	20	3	3	3	3	3	3	3	3	3	3	2	2	3	3	3	3	3	3	3	3	3	Undergraduate	43	NCUST
Male	Rural	20	3	3	3	4	4	4	4	3	4	4	3	2	2	2	2	3	2	2	2	2	2	Undergraduate	47	NCUST
Male	Rural	20	1	1	1	1	1	1	1	1	1	1	1	1	1	1	1	1	1	1	1	1	1	Undergraduate	15	NCUST
Male	Urban	20	3	3	3	3	3	3	3	3	3	3	4	4	4	4	4	4	4	4	4	4	4	Undergraduate	50	NCUST
Male	Urban	20	5	5	5	5	5	5	5	5	5	5	5	5	5	5	5	5	5	5	5	5	5	Undergraduate	75	NCUST
Male	Rural	20	2	4	3	3	4	1	2	4	4	3	1	2	2	4	4	1	3	4	2	3	3	Undergraduate	43	NCUST
Male	Urban	20	5	5	5	5	5	3	3	3	3	3	1	1	1	1	1	1	1	1	1	1	1	Undergraduate	45	NCUST
Male	Rural	20	3	3	3	3	3	3	3	3	3	3	3	3	3	3	3	3	3	3	3	3	3	Undergraduate	45	NCUST
Male	Rural	20	4	4	4	4	4	3	3	3	3	3	3	3	3	3	3	3	3	3	2	3	2	Undergraduate	50	NCUST
Female	Rural	20	5	5	5	5	5	4	4	4	4	4	4	4	4	4	4	4	4	4	4	4	4	Undergraduate	65	NCUST
Male	Rural	20	3	3	3	3	3	3	3	3	3	3	3	3	3	3	3	3	3	3	3	3	3	Undergraduate	45	NCUST
Male	Rural	20	3	4	3	5	4	2	1	2	1	2	2	3	4	3	4	4	4	4	4	3	4	Undergraduate	43	NCUST
Male	Rural	20	1	1	1	1	1	1	1	1	1	1	5	5	5	5	5	5	5	5	5	5	5	Undergraduate	35	NCUST
Male	Rural	20	3	3	3	3	3	3	3	3	3	3	3	3	3	3	3	3	3	3	3	3	3	Undergraduate	45	NCUST
Male	Rural	20	3	2	4	4	3	3	3	3	4	4	4	5	5	5	5	3	4	4	4	3	4	Undergraduate	57	NCUST
Male	Rural	20	5	5	5	5	5	5	5	5	5	5	5	5	5	5	5	5	5	5	5	5	5	Vocational Student	75	NCUST
Male	Rural	20	3	3	3	3	3	3	3	3	3	3	3	3	3	3	3	3	3	3	3	3	3	Undergraduate	45	NCUST
Male	Urban	20	4	4	4	4	4	4	4	4	4	4	4	4	4	4	4	4	4	4	4	4	4	Undergraduate	60	NCUST
Male	Rural	20	4	4	4	4	4	4	4	4	4	4	4	4	4	4	4	2	2	2	2	2	2	Undergraduate	60	NCUST
Male	Rural	20	4	4	4	4	4	4	4	4	4	4	4	4	4	4	4	4	4	4	4	4	4	Undergraduate	60	NCUST
Male	Rural	20	5	5	5	5	5	4	4	4	4	4	4	4	4	4	4	4	4	4	4	4	4	Undergraduate	65	NCUST
Male	Rural	20	3	3	3	3	3	3	3	3	3	3	3	3	3	3	3	3	3	3	3	3	3	Undergraduate	45	NCUST
Female	Rural	20	3	3	3	3	3	3	3	3	3	3	3	3	3	3	3	3	3	3	3	3	3	Undergraduate	45	NCUST
Female	Rural	20	3	3	3	3	3	3	3	3	3	3	3	3	3	3	3	3	2	3	3	3	3	Undergraduate	45	NCUST
Male	Rural	20	5	5	5	5	5	5	5	5	5	5	1	1	1	1	1	5	1	1	1	1	5	Undergraduate	55	NCUST
Female	Urban	20	4	3	3	2	2	2	2	2	2	2	2	2	2	2	2	2	2	1	1	1	1	Undergraduate	34	NCUST
Male	Urban	20	3	3	3	3	3	3	3	3	3	3	3	3	3	3	3	2	2	2	2	2	2	Undergraduate	45	NCUST
Male	Rural	20	4	3	4	3	5	2	2	2	2	4	3	3	3	3	3	2	2	2	2	2	3	Undergraduate	46	NCUST
Male	Rural	20	4	4	4	5	4	4	5	4	4	4	4	5	4	4	4	4	4	5	5	4	4	Undergraduate	63	NCUST
Female	Rural	21	4	3	4	4	4	3	3	3	3	3	2	2	2	2	2	2	2	2	2	2	2	Undergraduate	44	NCUST
Male	Rural	21	3	3	3	3	3	3	3	3	3	3	3	3	3	3	3	2	2	2	2	2	2	Undergraduate	45	NCUST
Male	Urban	21	4	3	4	4	3	4	4	4	4	5	4	4	3	3	3	3	3	4	4	4	4	Undergraduate	56	NCUST
Male	Rural	21	3	4	2	4	2	2	4	1	4	2	2	4	2	4	1	4	1	2	2	4	2	Undergraduate	41	NCUST
Male	Urban	21	1	1	1	2	1	4	4	4	4	5	4	4	4	4	5	4	4	4	4	4	3	Undergraduate	48	NCUST
Female	Urban	21	3	3	3	3	3	3	3	3	3	3	3	3	3	3	3	2	2	2	2	2	2	Undergraduate	45	NCUST
Male	Urban	21	3	5	4	5	4	5	4	5	4	5	4	5	3	5	3	4	5	1	5	3	5	Undergraduate	64	NCUST
Female	Rural	21	4	4	4	4	4	4	4	4	4	4	4	4	4	4	4	1	1	1	1	1	1	Undergraduate	60	NCUST
Male	Rural	21	1	1	1	1	1	1	1	1	1	1	1	1	1	1	1	1	1	1	1	1	1	Undergraduate	15	NCUST
Male	Rural	21	3	3	4	3	3	4	4	5	4	5	4	5	4	5	4	5	5	4	5	5	4	Undergraduate	60	NCUST
Male	Urban	21	3	3	5	5	4	3	2	2	2	2	2	2	2	2	2	4	5	5	5	5	5	Undergraduate	41	NCUST
Male	Rural	21	4	5	4	5	3	4	3	5	4	3	4	5	4	3	4	1	1	1	1	1	1	Undergraduate	60	NCUST
Male	Urban	21	4	4	4	4	4	4	4	4	4	4	4	4	4	4	4	4	4	4	4	4	4	Undergraduate	60	NCUST
Male	Urban	21	5	4	4	4	1	4	4	2	4	4	3	4	3	4	2	4	4	2	3	4	2	Undergraduate	52	NCUST
Male	Rural	21	1	2	3	4	2	4	2	4	2	4	2	4	2	4	2	2	4	4	4	2	4	Undergraduate	42	NCUST
Male	Rural	21	3	3	3	3	3	3	3	3	3	3	3	3	3	3	3	3	3	3	3	3	3	Undergraduate	45	NCUST
Male	Rural	21	1	1	1	1	1	5	1	1	1	1	1	1	1	1	1	1	1	1	1	1	1	Undergraduate	19	NCUST
Male	Rural	21	4	2	4	4	4	4	4	4	4	4	3	3	3	3	3	3	1	1	2	2	2	Undergraduate	53	NCUST
Male	Urban	21	5	1	3	1	1	1	1	1	1	1	2	1	3	1	1	1	1	1	1	1	2	Undergraduate	24	NCUST
Male	Rural	21	3	4	3	4	3	4	4	3	3	4	3	3	3	3	3	3	3	3	4	3	3	Undergraduate	50	NCUST
Female	Rural	21	5	5	5	5	5	4	4	4	4	4	4	4	4	4	4	4	4	4	4	4	4	Undergraduate	65	NCUST
Male	Rural	21	5	5	4	5	4	5	4	5	5	4	5	5	4	4	5	4	4	5	4	5	4	Undergraduate	69	NCUST
Male	Rural	21	4	4	4	4	4	4	4	4	4	4	3	2	2	2	2	2	2	2	2	3	4	Undergraduate	51	NCUST
Female	Urban	21	2	4	4	2	2	2	3	3	3	3	2	1	2	2	2	2	4	2	2	1	2	Undergraduate	37	NCUST
Male	Rural	21	1	2	1	2	2	1	2	1	2	1	2	1	2	1	1	2	1	2	1	1	2	Undergraduate	22	NCUST
Female	Rural	21	5	5	5	5	5	5	5	5	5	5	3	2	2	2	2	2	2	2	2	2	2	Undergraduate	61	NCUST
Male	Rural	21	1	1	1	1	1	1	1	1	1	1	1	1	1	1	1	1	1	1	1	1	1	Undergraduate	15	NCUST
Female	Rural	21	4	4	4	4	4	4	4	4	4	4	4	4	4	4	4	2	4	4	4	4	4	Undergraduate	60	Others
Male	Rural	22	3	3	3	3	3	3	3	3	3	3	3	3	3	3	3	3	3	3	3	3	3	Graduate	45	NCUST
Male	Rural	22	5	5	5	5	5	5	5	5	5	5	5	5	5	5	5	5	5	5	5	5	5	Undergraduate	75	NCUST
Male	Rural	22	3	3	3	3	3	3	3	1	1	1	2	2	2	2	2	1	1	1	2	2	2	Undergraduate	34	NCUST
Female	Rural	22	2	2	2	2	2	3	3	3	3	3	3	3	3	3	3	3	3	3	3	3	3	Graduate	40	NCUST
Male	Rural	22	3	3	3	3	3	3	3	3	3	3	3	3	3	3	3	3	4	3	4	3	2	Graduate	45	NCUST
Male	Rural	22	4	5	4	5	5	4	5	4	5	5	4	5	4	5	5	4	5	4	5	4	5	Undergraduate	69	NCUST
Male	Rural	22	2	4	4	2	3	4	3	4	4	2	4	3	3	3	4	4	2	4	2	4	2	Undergraduate	49	NCUST
Male	Rural	22	3	3	4	2	3	4	4	4	5	5	4	4	3	2	2	3	3	2	3	2	3	Undergraduate	52	NCUST
Male	Urban	22	4	4	4	4	3	3	3	2	3	4	2	3	2	2	2	1	2	1	2	1	2	Undergraduate	45	NCUST
Male	Rural	22	3	2	3	2	3	3	3	3	3	3	3	3	3	3	3	3	3	3	3	3	3	Undergraduate	43	NCUST
Male	Rural	22	3	3	3	3	3	3	3	3	3	3	3	3	3	3	3	3	3	3	3	3	3	Undergraduate	45	NCUST
Male	Rural	22	3	3	4	4	2	4	3	4	3	4	2	2	2	2	3	2	2	2	3	3	2	Undergraduate	45	NCUST
Male	Urban	22	4	3	4	4	4	4	3	4	4	3	4	3	4	4	3	4	3	4	4	4	4	Undergraduate	55	NCUST
Male	Urban	22	3	5	5	5	5	1	1	1	2	4	1	1	1	1	1	2	2	2	2	2	2	Undergraduate	37	NCUST
Male	Rural	22	4	4	4	4	4	4	4	4	4	4	4	4	4	4	4	3	3	3	3	3	3	Undergraduate	60	NCUST
Male	Rural	23	3	3	3	3	3	3	3	3	3	3	3	3	3	3	3	3	3	3	3	3	3	Graduate	45	NCUST
Male	Rural	23	5	3	3	3	5	3	2	2	2	3	2	2	2	1	1	5	5	5	5	5	5	Graduate	39	NCUST
Male	Rural	23	3	3	3	3	3	3	3	3	3	3	3	3	3	3	3	3	3	3	3	3	3	Graduate	45	NCUST
Male	Rural	23	3	3	4	3	3	4	3	4	4	3	3	3	3	3	3	3	3	3	3	3	3	Graduate	49	NCUST
Male	Rural	23	4	3	4	4	3	4	4	4	4	3	5	4	4	4	3	4	4	4	4	3	2	Undergraduate	57	Others
Male	Urban	24	4	3	4	5	3	3	3	3	3	4	3	1	3	2	1	1	1	1	2	1	2	Graduate	45	NCUST
Male	Urban	24	3	3	4	2	3	3	3	3	2	4	3	3	2	4	3	3	3	3	3	3	3	Graduate	45	NCUST
Male	Rural	25	5	4	5	5	4	5	4	4	5	5	5	4	5	4	5	5	4	5	5	4	5	Undergraduate	69	NCUST
Male	Rural	26	4	3	5	5	4	4	2	4	2	2	3	2	2	2	2	2	2	2	2	2	3	Graduate	46	NCUST
Male	Urban	26	5	5	5	3	3	2	4	3	4	3	3	5	5	3	4	1	1	5	5	3	3	Graduate	57	Others
