# Supplementary material for: Academic Tangping scale for college students in China: scale development, validation and application
Source: Sci Rep. 2026 Feb 9;16:7897. doi: 10.1038/s41598-026-38759-2 (PMC12954069; doi:10.1038/s41598-026-38759-2)
Supplement: Supplementary file 2 — Supplementary Material 2 [file 41598_2026_38759_MOESM2_ESM.xlsx]

## Sheet: Sheet1
Gender	BP	Age	Affective1	Affective2	Affective3	Affective4	Affective5	Behavioral1	Behavioral2	Behavioral3	Behavioral4	Behavioral5	Cognitive1	Cognitive2	Cognitive3	Cognitive4	Cognitive5	LyingTendency1	LyingTendency2	LyingTendency3	LyingTendency4	LyingTendency5	LyingTendency6	Education	Affective	Behavioral	Cognitive	LyingTendency	AverageTangping	University
Male	Rural	16	3	3	3	3	3	3	3	3	3	3	3	3	3	3	3	3	3	3	3	3	3	Undergraduate	3	3	3	3	3	NCUST
Female	Rural	17	5	5	5	5	5	5	5	5	5	5	2	2	2	2	2	3	1	1	1	4	5	Undergraduate	5	5	2	2.5	4	NCUST
Male	Rural	17	3	3	3	3	3	2	2	2	2	4	2	2	1	1	1	3	2	1	2	2	1	Undergraduate	3	2.4	1.4	1.83333	2.26667	NCUST
Male	Urban	17	2	2	2	2	2	2	2	2	2	2	2	2	2	2	2	2	2	2	2	2	2	Undergraduate	2	2	2	2	2	NCUST
Male	Rural	17	4	2	3	3	4	4	3	4	4	4	3	2	2	2	2	2	3	2	3	3	2	Undergraduate	3.2	3.8	2.2	2.5	3.06667	NCUST
Female	Rural	17	4	2	5	4	2	4	3	4	4	4	3	4	2	3	4	3	2	3	2	1	4	Undergraduate	3.4	3.8	3.2	2.5	3.46667	NCUST
Male	Rural	17	3	3	3	3	3	2	2	2	2	2	2	2	2	2	2	2	2	2	2	2	2	Undergraduate	3	2	2	2	2.33333	NCUST
Male	Rural	17	3	1	3	3	3	3	3	3	3	3	3	3	3	3	3	3	3	2	3	3	3	Undergraduate	2.6	3	3	2.83333	2.86667	NCUST
Male	Rural	17	2	2	2	4	4	2	2	2	2	2	2	2	2	2	2	1	1	1	1	1	1	Undergraduate	2.8	2	2	1	2.26667	NCUST
Male	Urban	17	3	2	4	3	4	4	3	4	3	4	3	2	4	2	3	2	2	1	2	1	2	Undergraduate	3.2	3.6	2.8	1.66667	3.2	NCUST
Male	Rural	17	4	5	4	5	3	2	1	2	2	1	1	1	2	1	2	1	2	1	2	1	2	Undergraduate	4.2	1.6	1.4	1.5	2.4	NCUST
Male	Rural	17	4	3	4	4	3	2	2	4	3	3	2	2	2	2	2	2	2	2	2	2	2	Undergraduate	3.6	2.8	2	2	2.8	NCUST
Male	Rural	17	3	3	3	3	3	3	3	3	3	3	3	3	3	3	3	3	3	3	3	3	3	Undergraduate	3	3	3	3	3	NCUST
Male	Urban	17	3	3	3	3	3	3	3	3	3	3	3	3	3	3	3	3	3	3	3	3	3	Undergraduate	3	3	3	3	3	NCUST
Male	Rural	17	1	1	3	3	2	1	1	1	1	1	1	1	1	1	1	1	1	1	1	1	1	Undergraduate	2	1	1	1	1.33333	NCUST
Male	Rural	17	3	2	4	4	4	3	2	4	3	2	2	2	2	1	2	3	2	1	2	2	2	Undergraduate	3.4	2.8	1.8	2	2.66667	NCUST
Female	Urban	17	4	2	3	4	4	2	2	2	2	3	2	2	2	1	1	2	1	1	1	1	2	Undergraduate	3.4	2.2	1.6	1.33333	2.4	NCUST
Male	Urban	17	3	1	1	2	1	2	2	2	2	2	4	4	1	1	1	3	3	3	3	3	3	Undergraduate	1.6	2	2.2	3	1.93333	NCUST
Male	Urban	17	2	4	1	1	1	2	2	3	2	2	1	1	1	1	1	1	1	1	1	1	1	Undergraduate	1.8	2.2	1	1	1.66667	NCUST
Female	Rural	17	3	2	3	3	3	2	4	2	4	2	3	2	3	2	3	3	2	4	2	3	3	Undergraduate	2.8	2.8	2.6	2.83333	2.73333	NCUST
Female	Rural	17	3	3	3	3	3	3	3	3	3	3	3	3	3	3	3	3	3	3	3	3	3	Undergraduate	3	3	3	3	3	NCUST
Male	Urban	17	5	5	5	5	5	5	5	5	5	5	5	5	5	5	5	5	5	5	5	5	5	Undergraduate	5	5	5	5	5	NCUST
Male	Urban	18	4	3	3	3	3	4	2	3	4	3	4	4	3	3	3	4	3	3	3	3	3	Undergraduate	3.2	3.2	3.4	3.16667	3.26667	NCUST
Male	Urban	18	3	3	3	3	3	3	3	3	3	3	3	3	3	3	3	3	3	3	3	3	3	Undergraduate	3	3	3	3	3	NCUST
Male	Rural	18	3	3	3	3	3	3	3	3	3	3	3	3	3	3	3	3	3	3	3	3	3	Undergraduate	3	3	3	3	3	NCUST
Male	Rural	18	4	4	4	3	4	2	2	2	3	3	1	2	2	1	1	1	1	1	3	1	2	Undergraduate	3.8	2.4	1.4	1.5	2.53333	NCUST
Female	Rural	18	3	3	3	3	3	3	4	2	2	2	2	2	2	1	4	3	2	2	1	1	4	Undergraduate	3	2.6	2.2	2.16667	2.6	NCUST
Male	Rural	18	3	2	3	3	3	3	3	3	3	3	3	3	2	2	2	3	3	2	3	3	3	Undergraduate	2.8	3	2.4	2.83333	2.73333	NCUST
Female	Rural	18	4	4	4	4	4	2	2	4	2	2	2	2	2	2	2	2	2	2	2	2	2	Undergraduate	4	2.4	2	2	2.8	NCUST
Male	Rural	18	3	3	3	3	3	3	3	3	3	3	3	3	3	3	3	3	3	3	3	3	3	Undergraduate	3	3	3	3	3	NCUST
Male	Rural	18	4	4	4	4	4	4	4	4	4	4	4	4	4	4	4	4	4	4	4	4	4	Undergraduate	4	4	4	4	4	NCUST
Male	Rural	18	3	2	4	4	4	4	2	2	2	4	3	3	3	2	3	2	2	2	2	1	2	Undergraduate	3.4	2.8	2.8	1.83333	3	NCUST
Female	Rural	18	3	2	3	2	3	2	2	2	2	2	2	2	2	2	2	2	2	2	2	2	2	Undergraduate	2.6	2	2	2	2.2	NCUST
Female	Urban	18	3	1	2	2	2	2	2	2	2	2	2	3	2	1	1	1	1	1	1	1	1	Undergraduate	2	2	1.8	1	1.93333	NCUST
Female	Rural	18	3	2	4	4	3	3	3	3	2	3	3	2	2	2	3	1	1	1	1	1	3	Undergraduate	3.2	2.8	2.4	1.33333	2.8	NCUST
Female	Rural	18	3	2	3	2	2	2	2	3	3	3	1	1	1	1	1	1	1	2	3	2	2	Undergraduate	2.4	2.6	1	1.83333	2	NCUST
Male	Rural	18	3	2	4	2	1	2	2	4	4	4	4	4	2	4	4	4	5	2	2	2	4	Undergraduate	2.4	3.2	3.6	3.16667	3.06667	NCUST
Male	Rural	18	3	3	3	3	3	3	3	3	3	3	3	3	3	3	3	4	2	2	2	3	1	Undergraduate	3	3	3	2.33333	3	NCUST
Male	Rural	18	3	2	2	3	3	3	3	3	3	3	2	2	2	2	2	2	1	1	2	2	2	Undergraduate	2.6	3	2	1.66667	2.53333	NCUST
Female	Rural	18	3	2	4	3	3	3	3	3	3	3	4	4	4	3	3	3	3	3	3	3	3	Undergraduate	3	3	3.6	3	3.2	NCUST
Female	Rural	18	3	4	4	3	3	2	3	3	2	3	2	2	2	2	2	2	2	2	3	2	2	Undergraduate	3.4	2.6	2	2.16667	2.66667	NCUST
Male	Rural	18	4	2	3	2	4	3	3	3	2	2	1	1	1	1	1	1	1	1	1	1	1	Undergraduate	3	2.6	1	1	2.2	NCUST
Male	Urban	18	2	2	4	2	2	2	4	2	4	4	2	2	2	2	2	3	3	2	4	4	3	Undergraduate	2.4	3.2	2	3.16667	2.53333	NCUST
Male	Rural	18	2	2	2	2	2	2	3	2	2	3	2	2	1	1	1	2	2	2	2	2	2	Undergraduate	2	2.4	1.4	2	1.93333	NCUST
Male	Rural	18	2	2	4	4	2	4	3	4	2	5	5	5	3	4	5	2	4	4	4	3	3	Undergraduate	2.8	3.6	4.4	3.33333	3.6	NCUST
Male	Rural	18	4	4	4	4	4	4	4	4	4	4	4	4	4	4	4	3	3	3	3	3	3	Undergraduate	4	4	4	3	4	NCUST
Male	Rural	18	3	2	3	3	2	2	3	2	4	2	2	2	3	2	3	4	5	4	5	4	3	Undergraduate	2.6	2.6	2.4	4.16667	2.53333	NCUST
Male	Urban	18	3	3	3	3	3	3	3	3	3	3	3	3	3	3	3	1	1	1	1	1	1	Undergraduate	3	3	3	1	3	NCUST
Female	Urban	18	4	3	4	3	4	2	2	2	2	2	3	3	2	1	1	2	1	1	1	1	1	Undergraduate	3.6	2	2	1.16667	2.53333	NCUST
Male	Rural	18	3	3	3	3	3	3	3	3	3	3	3	3	3	3	3	3	3	3	3	3	3	Undergraduate	3	3	3	3	3	NCUST
Male	Rural	18	3	3	3	3	3	3	3	3	3	3	3	3	3	3	3	3	2	2	2	2	2	Undergraduate	3	3	3	2.16667	3	NCUST
Male	Rural	18	3	3	3	3	3	3	3	3	3	3	3	3	3	3	3	3	3	3	3	3	3	Undergraduate	3	3	3	3	3	NCUST
Male	Rural	18	4	3	2	4	4	2	3	3	2	4	2	4	4	2	4	4	2	3	3	2	4	Undergraduate	3.4	2.8	3.2	3	3.13333	NCUST
Male	Rural	18	3	4	3	3	3	3	3	4	2	3	3	3	3	4	3	3	2	4	3	3	3	Undergraduate	3.2	3	3.2	3	3.13333	NCUST
Female	Rural	18	3	5	4	4	2	3	4	4	3	4	3	3	3	3	3	2	2	2	2	2	1	Undergraduate	3.6	3.6	3	1.83333	3.4	NCUST
Male	Urban	18	3	2	2	2	2	2	2	2	2	3	4	3	2	2	2	2	2	2	2	2	2	Undergraduate	2.2	2.2	2.6	2	2.33333	NCUST
Male	Rural	18	3	2	3	2	3	3	2	3	2	3	3	2	3	2	4	2	3	2	3	4	2	Undergraduate	2.6	2.6	2.8	2.66667	2.66667	NCUST
Male	Rural	18	3	3	3	3	3	3	3	3	3	3	3	3	3	3	3	3	3	3	3	3	3	Undergraduate	3	3	3	3	3	NCUST
Male	Rural	18	4	4	5	3	3	5	3	4	3	3	5	5	4	4	3	2	4	3	3	3	3	Undergraduate	3.8	3.6	4.2	3	3.86667	NCUST
Female	Rural	18	3	3	3	3	3	3	3	3	3	3	3	2	2	2	2	3	3	3	3	3	3	Undergraduate	3	3	2.2	3	2.73333	NCUST
Male	Rural	18	5	3	5	5	5	3	3	3	4	4	2	2	1	2	4	2	2	2	2	2	3	Undergraduate	4.6	3.4	2.2	2.16667	3.4	NCUST
Female	Rural	18	3	2	2	2	2	2	2	2	1	2	2	2	2	2	2	1	1	1	1	1	1	Undergraduate	2.2	1.8	2	1	2	NCUST
Female	Rural	18	3	3	3	3	3	3	3	3	3	3	3	3	3	3	3	3	3	3	3	3	3	Undergraduate	3	3	3	3	3	NCUST
Male	Rural	18	1	1	1	1	1	1	1	1	1	1	1	2	1	1	1	1	1	1	1	2	2	Undergraduate	1	1	1.2	1.33333	1.06667	NCUST
Female	Rural	18	3	3	4	4	4	2	2	2	2	2	2	2	2	2	2	1	1	1	1	1	1	Undergraduate	3.6	2	2	1	2.53333	NCUST
Male	Rural	18	3	3	3	3	2	3	3	3	3	3	5	5	4	5	5	2	4	2	4	3	2	Undergraduate	2.8	3	4.8	2.83333	3.53333	NCUST
Male	Rural	18	3	2	4	3	3	2	2	2	3	3	2	2	2	2	2	2	2	2	2	2	2	Undergraduate	3	2.4	2	2	2.46667	NCUST
Male	Rural	18	4	4	4	3	4	4	4	3	3	2	2	3	3	2	2	2	1	1	1	2	2	Undergraduate	3.8	3.2	2.4	1.5	3.13333	NCUST
Female	Rural	18	3	1	1	1	4	3	3	3	3	1	1	1	1	1	1	2	2	2	2	1	3	Undergraduate	2	2.6	1	2	1.86667	NCUST
Male	Rural	18	3	3	3	3	3	2	2	2	2	2	2	1	1	1	1	1	1	1	1	1	1	Undergraduate	3	2	1.2	1	2.06667	NCUST
Male	Rural	18	1	1	1	1	1	5	5	5	5	5	5	5	5	5	5	5	5	5	5	5	5	Undergraduate	1	5	5	5	3.66667	NCUST
Male	Rural	18	2	2	2	2	3	2	2	2	2	2	2	2	2	2	2	2	2	2	2	1	2	Undergraduate	2.2	2	2	1.83333	2.06667	NCUST
Male	Rural	18	2	2	2	2	2	2	2	2	2	2	2	2	2	2	2	3	3	2	3	3	3	Undergraduate	2	2	2	2.83333	2	NCUST
Male	Urban	18	5	3	2	5	1	2	3	3	3	3	2	4	3	2	3	2	2	2	2	2	2	Undergraduate	3.2	2.8	2.8	2	2.93333	NCUST
Male	Rural	18	3	3	3	3	3	3	3	3	3	3	3	3	3	3	3	1	1	1	1	1	1	Undergraduate	3	3	3	1	3	NCUST
Male	Urban	18	3	3	3	3	3	3	3	3	3	3	3	3	3	3	3	4	4	4	4	4	4	Undergraduate	3	3	3	4	3	NCUST
Male	Rural	18	5	5	5	5	5	5	5	5	5	5	5	5	5	5	5	5	5	5	5	5	5	Undergraduate	5	5	5	5	5	NCUST
Male	Rural	18	4	2	3	3	3	2	2	2	2	2	2	3	3	2	2	2	2	1	2	2	2	Undergraduate	3	2	2.4	1.83333	2.46667	NCUST
Male	Rural	18	5	5	5	5	5	5	5	5	5	5	5	5	5	5	5	5	5	5	5	5	5	Undergraduate	5	5	5	5	5	NCUST
Male	Rural	18	4	3	4	3	4	2	2	2	3	3	2	1	1	1	1	1	1	1	1	1	1	Undergraduate	3.6	2.4	1.2	1	2.4	NCUST
Male	Rural	18	3	4	4	4	4	3	4	4	4	4	4	4	4	4	4	4	4	4	4	4	4	Undergraduate	3.8	3.8	4	4	3.86667	NCUST
Male	Rural	18	4	2	3	3	4	2	3	3	2	2	1	1	1	1	1	2	2	1	3	2	3	Undergraduate	3.2	2.4	1	2.16667	2.2	NCUST
Male	Rural	18	3	3	3	3	3	3	3	3	3	3	3	3	3	3	3	3	3	3	3	3	3	Undergraduate	3	3	3	3	3	NCUST
Female	Rural	18	4	3	4	4	3	3	3	3	3	3	2	2	2	2	2	2	2	2	2	2	2	Undergraduate	3.6	3	2	2	2.86667	NCUST
Female	Urban	18	4	4	4	4	4	3	3	3	3	3	3	3	3	3	3	2	2	2	2	2	2	Undergraduate	4	3	3	2	3.33333	NCUST
Male	Urban	18	5	4	4	4	4	4	5	4	2	5	2	1	2	1	1	1	2	1	2	2	2	Undergraduate	4.2	4	1.4	1.66667	3.2	NCUST
Male	Urban	18	3	3	3	3	3	3	3	3	3	3	3	3	3	3	3	3	3	3	3	3	3	Undergraduate	3	3	3	3	3	NCUST
Male	Rural	18	4	2	4	4	4	4	2	4	4	4	2	2	2	2	2	2	3	2	2	3	2	Undergraduate	3.6	3.6	2	2.33333	3.06667	NCUST
Male	Rural	18	4	4	4	5	4	2	1	2	1	4	3	2	1	1	1	2	1	2	1	2	1	Undergraduate	4.2	2	1.6	1.5	2.6	NCUST
Female	Rural	18	3	3	3	3	3	3	3	2	2	4	2	1	1	1	1	2	2	2	2	2	2	Undergraduate	3	2.8	1.2	2	2.33333	NCUST
Male	Rural	18	3	2	4	3	3	4	3	3	3	4	2	2	2	2	2	2	2	2	2	2	2	Undergraduate	3	3.4	2	2	2.8	NCUST
Male	Rural	18	3	3	2	4	2	3	4	3	4	3	2	3	3	3	4	3	2	3	4	5	2	Undergraduate	2.8	3.4	3	3.16667	3.06667	NCUST
Female	Rural	18	4	2	5	3	2	3	2	2	3	4	3	4	2	3	2	2	2	2	3	2	2	Undergraduate	3.2	2.8	2.8	2.16667	2.93333	NCUST
Male	Urban	18	3	2	3	3	3	3	3	3	2	4	2	2	2	2	2	2	2	2	2	2	2	Undergraduate	2.8	3	2	2	2.6	NCUST
Male	Rural	18	3	3	4	2	2	3	3	3	3	3	2	2	2	2	2	1	1	1	2	2	3	Undergraduate	2.8	3	2	1.66667	2.6	NCUST
Female	Rural	18	3	3	3	3	3	4	4	4	3	4	3	2	2	2	2	3	2	2	3	3	3	Undergraduate	3	3.8	2.2	2.66667	3	NCUST
Female	Rural	18	2	2	3	4	4	2	2	2	2	2	1	1	1	1	1	1	1	1	1	1	1	Undergraduate	3	2	1	1	2	NCUST
Male	Urban	18	3	1	2	1	1	3	3	3	3	3	3	3	3	3	3	2	2	2	2	2	2	Undergraduate	1.6	3	3	2	2.53333	NCUST
Male	Rural	18	3	3	3	2	2	3	3	4	4	4	2	3	4	4	4	2	2	2	2	2	2	Undergraduate	2.6	3.6	3.4	2	3.2	NCUST
Female	Urban	18	3	3	3	3	3	2	2	2	2	2	2	2	2	2	2	2	2	2	2	2	2	Undergraduate	3	2	2	2	2.33333	NCUST
Male	Rural	18	3	3	3	3	3	3	3	3	3	3	1	2	3	2	2	3	3	3	4	4	3	Undergraduate	3	3	2	3.33333	2.66667	NCUST
Male	Rural	18	3	4	3	3	3	2	2	3	3	3	2	2	2	2	1	3	2	2	2	2	2	Undergraduate	3.2	2.6	1.8	2.16667	2.53333	NCUST
Male	Rural	18	4	2	3	3	2	3	4	3	2	3	3	2	3	4	3	2	4	3	3	3	3	Undergraduate	2.8	3	3	3	2.93333	NCUST
Female	Rural	18	3	4	3	4	3	3	2	3	2	3	3	2	2	2	3	3	2	2	3	3	2	Undergraduate	3.4	2.6	2.4	2.5	2.8	NCUST
Male	Rural	18	3	3	3	3	3	3	3	3	3	3	3	3	3	3	3	3	3	3	3	3	3	Undergraduate	3	3	3	3	3	NCUST
Male	Rural	18	3	3	3	3	3	3	3	2	3	3	3	2	2	2	2	3	2	2	3	2	2	Undergraduate	3	2.8	2.2	2.33333	2.66667	NCUST
Male	Rural	18	2	2	3	4	3	3	3	3	3	3	2	2	2	2	2	1	1	1	2	2	2	Undergraduate	2.8	3	2	1.5	2.6	NCUST
Male	Rural	18	4	5	4	5	4	5	4	5	4	5	4	5	4	4	4	4	5	4	5	4	4	Undergraduate	4.4	4.6	4.2	4.33333	4.4	NCUST
Male	Rural	18	5	4	3	4	4	4	3	4	3	4	4	4	4	4	5	4	4	3	2	2	4	Undergraduate	4	3.6	4.2	3.16667	3.93333	NCUST
Male	Rural	18	2	2	2	2	2	3	3	3	3	3	3	3	3	3	3	2	2	2	2	2	2	Undergraduate	2	3	3	2	2.66667	NCUST
Male	Rural	18	3	3	3	3	3	3	3	3	3	3	3	3	3	3	3	3	3	3	3	3	3	Undergraduate	3	3	3	3	3	NCUST
Male	Rural	18	3	3	3	3	3	3	3	3	3	3	3	3	3	3	3	4	4	4	4	4	4	Undergraduate	3	3	3	4	3	NCUST
Male	Urban	18	4	4	4	4	4	3	3	3	2	2	2	2	2	2	2	3	3	3	3	3	3	Undergraduate	4	2.6	2	3	2.86667	NCUST
Female	Rural	18	3	2	3	3	3	2	3	3	3	3	2	2	2	2	2	3	2	3	3	2	2	Undergraduate	2.8	2.8	2	2.5	2.53333	NCUST
Female	Urban	18	3	2	5	4	4	2	2	3	3	3	1	1	1	1	2	2	1	1	1	1	1	Undergraduate	3.6	2.6	1.2	1.16667	2.46667	NCUST
Female	Rural	18	4	3	4	4	4	3	2	2	2	3	2	2	2	2	2	2	2	2	2	2	2	Undergraduate	3.8	2.4	2	2	2.73333	NCUST
Female	Rural	18	4	3	3	3	3	3	3	3	3	3	4	4	2	2	2	3	3	3	3	3	3	Undergraduate	3.2	3	2.8	3	3	NCUST
Male	Rural	18	4	3	5	5	4	2	3	4	3	4	4	4	2	3	1	2	2	2	2	1	3	Undergraduate	4.2	3.2	2.8	2	3.4	NCUST
Male	Urban	18	4	4	4	4	4	4	4	4	4	4	4	4	4	4	4	4	4	4	4	4	4	Undergraduate	4	4	4	4	4	NCUST
Male	Urban	18	1	2	3	3	2	2	3	4	4	5	2	3	4	5	4	1	2	3	4	5	4	Undergraduate	2.2	3.6	3.6	3.16667	3.13333	NCUST
Female	Rural	18	4	4	4	3	3	2	2	2	2	2	2	2	2	2	2	1	1	1	1	1	1	Undergraduate	3.6	2	2	1	2.53333	NCUST
Male	Rural	18	3	3	4	4	4	4	3	3	2	4	4	2	2	2	2	2	2	2	2	2	2	Undergraduate	3.6	3.2	2.4	2	3.06667	NCUST
Female	Rural	19	5	5	5	5	5	5	5	5	5	5	3	3	3	3	3	1	1	1	1	1	1	Undergraduate	5	5	3	1	4.33333	NCUST
Male	Rural	19	3	3	3	3	3	3	3	3	3	3	3	3	3	3	3	4	4	3	4	3	4	Undergraduate	3	3	3	3.66667	3	NCUST
Female	Rural	19	4	4	4	4	4	2	2	2	2	2	2	2	2	2	2	2	2	2	2	2	2	Undergraduate	4	2	2	2	2.66667	NCUST
Male	Rural	19	3	3	3	3	3	3	3	3	3	3	3	3	3	3	3	3	3	3	3	3	3	Undergraduate	3	3	3	3	3	NCUST
Male	Rural	19	3	3	3	3	3	3	3	3	3	3	3	3	3	3	3	3	3	3	3	3	3	Undergraduate	3	3	3	3	3	NCUST
Male	Rural	19	4	4	4	4	4	2	2	2	2	2	2	2	2	2	2	1	1	1	1	1	1	Undergraduate	4	2	2	1	2.66667	NCUST
Female	Rural	19	4	4	4	4	4	4	4	4	4	4	4	3	1	1	1	2	2	2	2	2	4	Undergraduate	4	4	2	2.33333	3.33333	NCUST
Female	Rural	19	2	2	3	1	2	2	3	2	1	2	3	2	2	1	2	3	2	2	3	1	2	Undergraduate	2	2	2	2.16667	2	NCUST
Male	Rural	19	4	2	3	2	3	2	2	3	3	2	2	2	2	2	2	2	2	2	2	2	2	Undergraduate	2.8	2.4	2	2	2.4	NCUST
Male	Urban	19	2	2	3	3	5	3	3	2	3	3	2	4	2	2	2	2	1	2	3	3	3	Undergraduate	3	2.8	2.4	2.33333	2.73333	NCUST
Female	Rural	19	4	2	2	4	4	2	2	2	2	2	2	2	2	2	2	2	2	2	2	2	2	Undergraduate	3.2	2	2	2	2.4	NCUST
Male	Rural	19	3	3	3	3	3	3	3	3	3	3	3	3	3	3	3	3	3	3	3	3	3	Undergraduate	3	3	3	3	3	NCUST
Male	Rural	19	2	5	2	4	4	1	3	3	4	4	4	3	3	4	3	3	5	3	4	3	3	Undergraduate	3.4	3	3.4	3.5	3.26667	NCUST
Male	Rural	19	3	2	4	3	3	2	2	3	3	3	2	2	2	2	2	2	2	2	2	2	3	Undergraduate	3	2.6	2	2.16667	2.53333	NCUST
Male	Rural	19	1	3	1	3	4	5	1	4	3	4	4	2	4	4	2	5	4	1	4	2	4	Undergraduate	2.4	3.4	3.2	3.33333	3	NCUST
Male	Rural	19	4	4	4	4	4	4	4	4	4	4	4	4	4	4	4	4	4	4	4	4	4	Undergraduate	4	4	4	4	4	NCUST
Female	Rural	19	3	2	2	3	4	2	2	3	4	3	3	3	2	2	2	4	3	2	2	1	2	Undergraduate	2.8	2.8	2.4	2.33333	2.66667	NCUST
Female	Rural	19	4	4	4	4	4	4	4	4	4	4	4	4	4	4	4	4	4	4	5	4	4	Undergraduate	4	4	4	4.16667	4	NCUST
Male	Rural	19	3	3	2	3	3	3	3	3	3	2	3	2	3	3	2	3	3	4	3	4	3	Undergraduate	2.8	2.8	2.6	3.33333	2.73333	NCUST
Male	Rural	19	5	5	5	5	5	5	5	5	5	5	5	5	5	5	5	5	5	5	5	5	5	Undergraduate	5	5	5	5	5	NCUST
Male	Rural	19	4	4	4	4	4	2	2	2	2	3	1	1	1	1	1	1	1	1	1	1	1	Undergraduate	4	2.2	1	1	2.4	NCUST
Male	Rural	19	5	5	5	5	5	5	5	3	2	2	2	2	2	1	1	2	1	1	2	1	1	Undergraduate	5	3.4	1.6	1.33333	3.33333	NCUST
Male	Urban	19	5	5	5	5	5	5	5	5	5	5	5	5	5	5	5	5	5	5	5	5	5	Undergraduate	5	5	5	5	5	NCUST
Female	Rural	19	4	4	4	4	4	2	2	2	2	2	2	2	2	2	2	2	2	2	2	1	2	Undergraduate	4	2	2	1.83333	2.66667	NCUST
Male	Rural	19	3	2	3	3	3	2	2	2	2	2	2	2	2	2	2	1	2	2	2	2	2	Undergraduate	2.8	2	2	1.83333	2.26667	NCUST
Male	Urban	19	4	3	4	4	4	2	3	3	3	4	3	2	3	2	2	3	2	3	2	2	3	Undergraduate	3.8	3	2.4	2.5	3.06667	NCUST
Female	Rural	19	4	4	4	4	4	3	3	3	3	3	2	3	2	2	2	1	1	1	1	1	1	Undergraduate	4	3	2.2	1	3.06667	NCUST
Male	Rural	19	3	3	5	5	5	1	2	3	1	1	1	1	1	1	1	1	1	1	1	1	1	Undergraduate	4.2	1.6	1	1	2.26667	NCUST
Male	Urban	19	2	1	2	1	2	2	1	2	1	2	4	2	3	2	1	1	1	1	1	1	1	Undergraduate	1.6	1.6	2.4	1	1.86667	NCUST
Male	Rural	19	3	3	3	3	3	3	3	3	3	3	3	3	3	3	3	3	3	3	3	3	3	Undergraduate	3	3	3	3	3	NCUST
Male	Urban	19	3	3	4	3	3	4	4	4	4	4	4	3	3	3	3	3	3	2	3	4	2	Undergraduate	3.2	4	3.2	2.83333	3.46667	NCUST
Male	Rural	19	4	2	2	2	2	2	2	2	2	2	2	2	2	2	2	2	2	2	2	2	2	Undergraduate	2.4	2	2	2	2.13333	NCUST
Female	Rural	19	1	1	1	1	1	1	1	1	1	1	1	1	1	1	1	1	1	1	1	1	1	Undergraduate	1	1	1	1	1	NCUST
Male	Urban	19	5	4	5	5	5	3	4	3	1	3	3	2	2	1	1	2	1	2	2	2	3	Undergraduate	4.8	2.8	1.8	2	3.13333	NCUST
Female	Rural	19	4	3	4	3	3	2	2	2	2	2	2	2	1	1	1	1	1	1	1	1	1	Undergraduate	3.4	2	1.4	1	2.26667	NCUST
Female	Urban	19	4	4	5	5	5	5	5	5	5	5	3	2	2	2	2	2	2	2	2	2	1	Undergraduate	4.6	5	2.2	1.83333	3.93333	NCUST
Male	Urban	19	4	3	5	4	3	3	3	1	4	3	2	2	2	2	1	3	2	3	2	1	3	Undergraduate	3.8	2.8	1.8	2.33333	2.8	NCUST
Male	Urban	19	3	4	3	1	2	1	1	1	2	2	2	1	1	1	1	1	1	1	1	1	1	Undergraduate	2.6	1.4	1.2	1	1.73333	NCUST
Male	Urban	19	3	3	3	3	3	3	3	3	3	3	3	3	3	3	3	3	3	3	3	3	3	Undergraduate	3	3	3	3	3	NCUST
Male	Rural	19	3	3	3	3	3	3	3	3	3	3	3	3	3	3	3	2	2	1	1	1	1	Undergraduate	3	3	3	1.33333	3	NCUST
Male	Urban	19	2	2	2	2	2	2	2	2	2	2	2	2	2	2	2	1	1	1	1	1	1	Undergraduate	2	2	2	1	2	NCUST
Male	Rural	19	1	1	5	3	1	3	3	5	3	5	5	5	1	1	1	3	1	1	5	5	1	Undergraduate	2.2	3.8	2.6	2.66667	2.86667	NCUST
Male	Rural	19	3	3	3	3	3	3	3	3	3	3	3	3	3	3	3	3	3	3	3	3	3	Undergraduate	3	3	3	3	3	NCUST
Male	Urban	19	5	5	5	5	5	5	5	5	5	5	5	5	5	5	5	5	5	5	5	5	5	Undergraduate	5	5	5	5	5	NCUST
Male	Urban	19	3	3	3	2	3	3	2	3	3	2	3	3	3	3	4	3	3	2	3	2	3	Undergraduate	2.8	2.6	3.2	2.66667	2.86667	NCUST
Female	Rural	19	2	4	4	3	2	2	2	2	3	3	3	3	3	3	3	2	2	2	2	2	2	Undergraduate	3	2.4	3	2	2.8	NCUST
Male	Urban	19	4	4	4	4	4	4	4	4	4	4	4	4	4	4	4	4	4	4	4	4	4	Undergraduate	4	4	4	4	4	Others
Male	Rural	19	3	3	3	3	3	2	2	2	2	2	2	2	2	2	2	2	2	2	2	2	2	Undergraduate	3	2	2	2	2.33333	NCUST
Male	Rural	19	2	2	5	4	3	4	4	5	1	5	3	4	4	2	4	4	3	2	1	1	2	Undergraduate	3.2	3.8	3.4	2.16667	3.46667	NCUST
Female	Rural	19	3	2	3	3	3	2	2	3	3	2	2	2	1	2	2	2	1	1	2	2	2	Undergraduate	2.8	2.4	1.8	1.66667	2.33333	NCUST
Male	Rural	19	2	1	4	4	2	2	2	2	2	2	1	1	1	1	1	1	1	1	1	1	1	Undergraduate	2.6	2	1	1	1.86667	NCUST
Male	Urban	19	3	3	4	4	3	4	3	4	3	4	3	3	2	3	3	4	3	2	3	2	2	Undergraduate	3.4	3.6	2.8	2.66667	3.26667	NCUST
Male	Rural	19	4	3	4	3	4	4	3	4	3	4	3	3	2	2	2	2	2	2	2	2	4	Undergraduate	3.6	3.6	2.4	2.33333	3.2	NCUST
Male	Rural	19	4	3	3	4	3	3	4	4	4	3	3	2	2	2	2	2	2	2	3	3	3	Undergraduate	3.4	3.6	2.2	2.5	3.06667	NCUST
Female	Urban	19	4	4	5	4	4	3	3	4	3	4	2	2	2	2	2	2	2	2	2	2	2	Undergraduate	4.2	3.4	2	2	3.2	NCUST
Male	Rural	19	1	1	2	1	1	1	1	1	1	1	1	1	1	1	1	1	1	1	1	1	1	Undergraduate	1.2	1	1	1	1.06667	NCUST
Male	Urban	19	2	4	4	4	4	4	3	3	2	4	2	2	2	2	2	1	1	1	1	1	1	Undergraduate	3.6	3.2	2	1	2.93333	NCUST
Male	Rural	19	2	2	2	2	2	2	2	2	2	2	2	2	2	2	2	2	2	2	2	2	2	Undergraduate	2	2	2	2	2	NCUST
Male	Rural	19	3	4	2	3	3	2	2	3	2	3	2	2	1	1	1	1	1	1	1	1	1	Undergraduate	3	2.4	1.4	1	2.26667	NCUST
Male	Rural	19	4	4	4	4	4	4	4	4	4	4	2	2	2	2	2	2	2	2	2	2	2	Undergraduate	4	4	2	2	3.33333	NCUST
Male	Urban	19	3	3	3	3	3	3	3	3	3	3	3	3	3	3	3	3	3	3	3	3	3	Undergraduate	3	3	3	3	3	NCUST
Male	Rural	19	2	3	4	3	3	3	4	3	4	3	4	3	3	3	4	4	3	2	3	4	3	Undergraduate	3	3.4	3.4	3.16667	3.26667	NCUST
Male	Rural	19	4	4	4	4	4	4	4	4	4	4	2	2	2	2	2	2	2	2	2	2	2	Undergraduate	4	4	2	2	3.33333	NCUST
Female	Urban	19	3	3	3	3	4	2	2	3	4	4	3	3	2	2	3	3	3	3	4	3	4	Undergraduate	3.2	3	2.6	3.33333	2.93333	NCUST
Male	Rural	19	2	2	3	2	1	4	4	4	4	3	5	5	5	3	3	2	2	2	4	2	3	Undergraduate	2	3.8	4.2	2.5	3.33333	NCUST
Male	Rural	19	2	3	3	3	3	4	4	4	3	4	5	5	4	5	5	3	4	4	4	4	3	Undergraduate	2.8	3.8	4.8	3.66667	3.8	NCUST
Male	Rural	19	4	2	3	2	3	2	2	2	2	2	2	2	2	2	2	1	1	1	1	1	1	Undergraduate	2.8	2	2	1	2.26667	NCUST
Male	Rural	19	3	3	3	3	3	3	3	3	3	3	3	3	3	3	3	3	3	3	3	3	3	Undergraduate	3	3	3	3	3	NCUST
Female	Rural	19	3	4	4	4	4	3	3	3	3	3	2	2	2	2	2	2	2	2	2	2	2	Undergraduate	3.8	3	2	2	2.93333	NCUST
Male	Rural	19	3	3	3	3	3	3	3	3	3	3	3	3	3	3	3	3	3	3	3	3	3	Undergraduate	3	3	3	3	3	NCUST
Female	Urban	19	5	5	5	5	5	3	3	3	3	5	3	3	3	3	3	4	2	2	3	2	4	Undergraduate	5	3.4	3	2.83333	3.8	NCUST
Female	Urban	19	3	2	3	3	3	3	3	3	3	3	3	2	2	2	2	4	2	2	2	2	2	Undergraduate	2.8	3	2.2	2.33333	2.66667	NCUST
Female	Rural	19	3	3	3	3	3	3	3	3	3	3	3	3	3	3	3	3	3	3	3	3	3	Undergraduate	3	3	3	3	3	NCUST
Female	Rural	19	3	2	3	2	3	2	2	3	3	3	2	3	3	3	3	3	3	2	3	3	2	Undergraduate	2.6	2.6	2.8	2.66667	2.66667	NCUST
Male	Rural	19	3	3	3	3	3	3	3	3	3	3	3	3	3	3	3	3	3	3	3	3	3	Undergraduate	3	3	3	3	3	NCUST
Female	Rural	19	3	3	5	2	3	2	2	2	2	2	1	1	1	1	1	1	1	1	1	1	1	Undergraduate	3.2	2	1	1	2.06667	NCUST
Male	Rural	19	1	1	1	1	1	1	1	1	1	1	1	1	1	1	1	1	1	1	1	1	1	Undergraduate	1	1	1	1	1	NCUST
Male	Rural	19	4	4	4	4	4	4	4	4	4	4	4	4	4	4	4	4	4	4	4	4	4	Undergraduate	4	4	4	4	4	NCUST
Male	Rural	19	1	1	1	1	1	1	1	1	1	1	1	1	1	1	1	1	1	1	1	1	1	Undergraduate	1	1	1	1	1	NCUST
Male	Rural	19	3	3	4	2	3	3	2	4	2	3	3	2	3	2	4	3	3	3	2	2	3	Undergraduate	3	2.8	2.8	2.66667	2.86667	NCUST
Female	Urban	19	3	3	3	3	3	2	2	2	2	2	3	3	3	3	3	3	2	2	2	2	2	Undergraduate	3	2	3	2.16667	2.66667	NCUST
Male	Urban	19	3	3	3	3	3	3	3	3	3	3	3	3	3	3	3	3	3	3	3	3	3	Undergraduate	3	3	3	3	3	NCUST
Male	Rural	19	4	4	4	4	4	4	4	4	4	4	3	4	4	4	4	2	2	2	2	2	2	Undergraduate	4	4	3.8	2	3.93333	NCUST
Male	Rural	19	3	3	3	3	3	3	3	3	3	3	1	1	1	1	1	1	1	1	1	1	1	Undergraduate	3	3	1	1	2.33333	NCUST
Male	Rural	19	3	3	3	3	3	3	3	3	3	3	2	4	2	2	2	2	2	2	2	2	2	Undergraduate	3	3	2.4	2	2.8	NCUST
Male	Rural	20	4	4	4	4	4	4	4	4	4	4	4	4	4	4	4	4	4	4	4	4	4	Undergraduate	4	4	4	4	4	NCUST
Male	Rural	20	2	3	5	3	4	5	5	5	4	5	4	2	1	1	1	2	1	1	1	3	2	Undergraduate	3.4	4.8	1.8	1.66667	3.33333	NCUST
Male	Rural	20	5	5	5	5	5	5	5	5	5	5	5	5	5	5	5	5	5	5	5	5	5	Undergraduate	5	5	5	5	5	NCUST
Male	Rural	20	5	5	5	5	5	5	5	5	5	5	5	5	5	5	5	5	5	5	5	5	5	Undergraduate	5	5	5	5	5	NCUST
Male	Rural	20	3	3	3	3	3	3	3	3	3	3	3	3	3	3	3	3	3	3	3	4	4	Undergraduate	3	3	3	3.33333	3	NCUST
Male	Rural	20	3	2	4	4	2	3	2	3	3	4	4	2	2	3	3	2	2	2	3	2	2	Undergraduate	3	3	2.8	2.16667	2.93333	NCUST
Male	Urban	20	4	3	3	3	3	3	3	3	3	3	1	1	1	1	1	1	1	1	1	1	1	Undergraduate	3.2	3	1	1	2.4	NCUST
Male	Rural	20	5	4	5	4	5	5	4	5	5	5	4	4	4	4	5	5	5	5	4	5	5	Undergraduate	4.6	4.8	4.2	4.83333	4.53333	NCUST
Male	Urban	20	5	5	5	5	5	5	5	2	5	5	3	1	1	1	1	3	1	1	4	2	2	Undergraduate	5	4.4	1.4	2.16667	3.6	NCUST
Male	Rural	20	4	4	5	4	5	1	2	2	1	1	3	3	2	2	3	2	2	2	2	2	2	Undergraduate	4.4	1.4	2.6	2	2.8	NCUST
Female	Rural	20	4	4	4	4	4	2	2	2	3	3	2	2	2	2	2	2	2	2	2	2	2	Undergraduate	4	2.4	2	2	2.8	NCUST
Male	Rural	20	3	1	4	4	3	1	1	1	1	4	2	2	2	2	2	1	1	1	1	3	2	Undergraduate	3	1.6	2	1.5	2.2	NCUST
Male	Urban	20	4	4	4	4	4	4	4	4	4	4	2	3	3	3	4	1	1	1	1	1	1	Undergraduate	4	4	3	1	3.66667	NCUST
Male	Rural	20	2	2	4	2	4	2	2	2	2	3	2	2	2	2	2	2	2	2	2	2	2	Undergraduate	2.8	2.2	2	2	2.33333	NCUST
Male	Urban	20	2	2	3	3	3	3	3	3	3	3	2	2	2	2	2	2	2	2	2	2	2	Undergraduate	2.6	3	2	2	2.53333	NCUST
Male	Rural	20	3	2	4	3	3	4	3	3	3	4	3	2	2	3	2	3	3	3	3	3	3	Undergraduate	3	3.4	2.4	3	2.93333	NCUST
Male	Rural	20	3	4	3	4	3	4	3	4	3	4	3	4	3	4	3	3	4	3	4	3	4	Undergraduate	3.4	3.6	3.4	3.5	3.46667	NCUST
Male	Rural	20	4	3	5	3	4	3	3	3	2	3	2	2	2	2	2	1	1	1	2	2	1	Undergraduate	3.8	2.8	2	1.33333	2.86667	NCUST
Male	Urban	20	3	3	4	2	3	2	4	2	3	3	4	3	3	2	4	3	4	3	4	3	4	Undergraduate	3	2.8	3.2	3.5	3	NCUST
Male	Rural	20	3	3	3	3	3	3	3	3	3	3	3	3	3	3	3	3	3	3	3	3	3	Undergraduate	3	3	3	3	3	NCUST
Male	Urban	20	3	3	4	3	4	4	2	4	4	4	4	3	3	2	3	4	3	3	3	3	4	Undergraduate	3.4	3.6	3	3.33333	3.33333	NCUST
Male	Rural	20	3	4	2	3	3	2	3	3	4	3	4	3	3	2	3	4	3	3	4	2	3	Undergraduate	3	3	3	3.16667	3	NCUST
Female	Rural	20	3	2	3	3	1	2	2	2	3	3	2	2	2	2	2	2	2	2	2	2	2	Undergraduate	2.4	2.4	2	2	2.26667	NCUST
Male	Rural	20	3	4	3	4	3	2	4	3	2	3	3	2	3	4	3	4	2	3	3	4	3	Undergraduate	3.4	2.8	3	3.16667	3.06667	NCUST
Female	Rural	20	3	2	3	2	3	2	2	2	2	2	1	1	1	1	1	2	1	2	1	1	2	Undergraduate	2.6	2	1	1.5	1.86667	NCUST
Male	Rural	20	1	1	1	1	1	3	3	3	3	3	2	3	2	2	2	3	3	3	3	3	3	Undergraduate	1	3	2.2	3	2.06667	NCUST
Female	Rural	20	4	3	4	4	4	4	2	4	4	4	4	2	3	2	2	2	2	2	2	2	2	Undergraduate	3.8	3.6	2.6	2	3.33333	NCUST
Male	Rural	20	5	5	5	5	5	3	3	3	3	3	3	3	3	3	3	4	4	4	4	4	4	Undergraduate	5	3	3	4	3.66667	NCUST
Female	Urban	20	3	3	4	4	4	4	2	4	4	4	4	3	2	2	3	2	2	2	2	2	3	Undergraduate	3.6	3.6	2.8	2.16667	3.33333	NCUST
Male	Urban	20	3	3	3	3	3	3	3	3	3	3	3	3	3	3	3	3	3	3	3	3	3	Undergraduate	3	3	3	3	3	NCUST
Male	Rural	20	2	2	2	2	2	2	2	2	2	2	2	2	2	2	2	2	2	2	2	2	2	Undergraduate	2	2	2	2	2	NCUST
Male	Rural	20	4	4	4	4	4	5	5	5	5	5	3	3	3	3	3	3	3	3	3	3	3	Undergraduate	4	5	3	3	4	NCUST
Male	Rural	20	2	2	3	4	4	4	4	3	4	4	3	1	1	1	1	1	1	1	1	1	2	Undergraduate	3	3.8	1.4	1.16667	2.73333	NCUST
Male	Urban	20	3	3	3	3	3	3	3	3	3	3	3	3	3	3	3	3	3	3	3	3	3	Undergraduate	3	3	3	3	3	NCUST
Male	Urban	20	3	3	3	3	3	3	3	3	3	3	3	3	3	3	3	3	3	3	3	3	3	Undergraduate	3	3	3	3	3	NCUST
Male	Rural	20	3	3	4	3	3	2	2	2	2	2	2	2	2	2	2	3	3	3	3	3	3	Undergraduate	3.2	2	2	3	2.4	NCUST
Male	Rural	20	4	4	4	4	4	4	4	4	4	4	4	4	4	4	1	4	4	3	3	4	4	Undergraduate	4	4	3.4	3.66667	3.8	NCUST
Female	Rural	20	4	3	4	4	4	4	5	4	5	4	4	3	3	2	2	1	4	1	1	1	1	Undergraduate	3.8	4.4	2.8	1.5	3.66667	NCUST
Male	Urban	20	3	3	3	3	3	3	3	3	3	3	3	3	3	3	3	3	3	3	3	3	3	Undergraduate	3	3	3	3	3	NCUST
Female	Rural	20	3	3	3	3	3	3	3	3	3	3	3	3	3	3	3	3	3	3	3	3	3	Undergraduate	3	3	3	3	3	NCUST
Female	Rural	20	4	3	4	4	4	4	5	4	5	4	4	3	3	2	2	1	4	1	1	1	1	Undergraduate	3.8	4.4	2.8	1.5	3.66667	NCUST
Female	Urban	20	5	5	5	5	5	5	5	5	5	5	1	1	1	1	1	1	1	1	1	1	1	Undergraduate	5	5	1	1	3.66667	NCUST
Male	Rural	20	2	3	4	5	3	3	4	3	3	3	2	2	3	2	2	4	1	3	4	4	2	Undergraduate	3.4	3.2	2.2	3	2.93333	NCUST
Male	Rural	20	2	2	2	2	2	2	2	2	2	2	2	2	2	2	2	2	2	2	2	2	2	Undergraduate	2	2	2	2	2	NCUST
Male	Rural	20	4	4	4	4	4	4	4	4	4	4	4	4	4	4	4	4	4	4	4	4	4	Undergraduate	4	4	4	4	4	NCUST
Male	Rural	20	2	2	2	2	2	2	2	2	2	2	2	2	2	2	2	2	2	2	2	2	2	Undergraduate	2	2	2	2	2	NCUST
Female	Urban	20	4	4	4	4	4	3	3	3	3	3	4	4	4	4	4	3	3	3	3	3	3	Undergraduate	4	3	4	3	3.66667	NCUST
Female	Urban	20	3	5	2	3	5	2	1	4	2	2	1	1	1	1	1	1	1	1	1	1	1	Undergraduate	3.6	2.2	1	1	2.26667	NCUST
Male	Urban	20	3	3	3	3	3	3	3	3	3	3	3	3	3	3	3	3	3	3	3	3	3	Undergraduate	3	3	3	3	3	NCUST
Male	Rural	20	2	2	2	2	2	2	2	2	2	2	2	2	2	2	2	2	2	2	2	2	2	Undergraduate	2	2	2	2	2	NCUST
Male	Urban	20	4	3	1	2	1	2	1	2	2	2	4	3	3	3	3	2	2	1	2	2	2	Undergraduate	2.2	1.8	3.2	1.83333	2.4	NCUST
Male	Rural	21	3	3	3	3	3	3	3	3	3	3	2	2	2	2	2	3	2	2	2	2	2	Undergraduate	3	3	2	2.16667	2.66667	NCUST
Male	Urban	21	2	2	4	4	2	4	4	2	4	4	4	5	4	3	2	5	3	2	4	3	5	Undergraduate	2.8	3.6	3.6	3.66667	3.33333	NCUST
Male	Rural	21	2	2	2	4	4	4	4	4	4	4	2	4	2	2	3	4	3	4	3	4	3	Undergraduate	2.8	4	2.6	3.5	3.13333	NCUST
Female	Rural	21	4	3	4	4	4	3	3	4	4	4	3	4	4	4	3	4	3	4	4	4	4	Undergraduate	3.8	3.6	3.6	3.83333	3.66667	Others
Male	Urban	21	3	3	3	3	3	3	3	3	3	3	3	3	3	3	3	3	3	3	3	3	3	Undergraduate	3	3	3	3	3	NCUST
Male	Rural	21	5	5	5	5	5	5	5	5	5	5	5	5	5	5	5	5	5	5	5	5	5	Undergraduate	5	5	5	5	5	NCUST
Male	Urban	21	4	4	5	4	5	4	5	4	3	3	4	4	3	4	4	5	4	5	4	4	4	Undergraduate	4.4	3.8	3.8	4.33333	4	NCUST
Male	Rural	21	4	3	4	4	4	2	2	3	2	3	3	3	3	3	3	2	2	1	2	1	2	Undergraduate	3.8	2.4	3	1.66667	3.06667	NCUST
Male	Rural	21	4	4	4	4	4	4	4	4	4	4	4	4	4	4	4	4	4	4	4	4	4	Undergraduate	4	4	4	4	4	NCUST
Male	Rural	21	3	3	3	3	3	4	4	4	4	4	4	4	4	4	4	4	4	4	4	4	4	Undergraduate	3	4	4	4	3.66667	NCUST
Male	Rural	21	4	3	3	3	3	3	3	2	3	4	3	3	3	3	3	1	1	1	1	1	1	Undergraduate	3.2	3	3	1	3.06667	NCUST
Female	Urban	21	1	1	1	1	1	1	1	1	1	1	1	1	1	1	1	1	1	1	1	1	1	Vocational Student	1	1	1	1	1	Others
Male	Rural	21	3	3	3	3	3	3	3	3	3	3	3	3	3	3	3	1	1	1	1	1	1	Undergraduate	3	3	3	1	3	NCUST
Male	Rural	21	2	3	4	3	4	2	2	2	2	2	2	5	2	2	2	2	3	2	2	2	4	Undergraduate	3.2	2	2.6	2.5	2.6	NCUST
Male	Rural	21	5	5	5	5	5	4	4	4	4	4	2	2	2	2	2	4	4	4	4	4	4	Undergraduate	5	4	2	4	3.66667	NCUST
Male	Rural	21	3	3	3	3	3	3	3	3	3	3	3	3	3	3	3	3	3	3	3	3	3	Undergraduate	3	3	3	3	3	NCUST
Male	Urban	21	3	3	3	3	3	3	3	3	3	3	3	3	3	3	3	3	3	3	3	3	3	Undergraduate	3	3	3	3	3	NCUST
Male	Rural	21	5	5	5	5	5	3	3	3	3	3	3	3	3	3	3	3	3	3	3	3	3	Undergraduate	5	3	3	3	3.66667	NCUST
Female	Rural	21	2	3	3	4	3	4	4	4	3	4	3	4	3	2	4	3	2	2	2	2	4	Graduate	3	3.8	3.2	2.5	3.33333	NCUST
Male	Rural	21	4	4	4	4	4	4	4	4	3	4	2	2	2	2	2	2	2	2	2	2	2	Undergraduate	4	3.8	2	2	3.26667	NCUST
Male	Urban	21	3	3	3	3	3	3	3	3	3	3	3	3	3	3	3	3	3	3	3	3	3	Undergraduate	3	3	3	3	3	NCUST
Male	Rural	21	5	5	5	5	5	5	5	5	5	5	5	5	5	5	5	5	5	5	5	5	5	Undergraduate	5	5	5	5	5	NCUST
Male	Rural	21	3	3	3	3	3	3	3	3	3	3	3	3	3	3	3	3	3	3	3	3	3	Undergraduate	3	3	3	3	3	NCUST
Male	Rural	21	3	3	3	3	3	4	3	3	3	3	3	3	3	3	3	3	3	3	3	3	3	Undergraduate	3	3.2	3	3	3.06667	NCUST
Male	Rural	21	4	3	3	3	3	3	3	3	3	3	3	3	3	3	3	3	3	4	3	4	3	Undergraduate	3.2	3	3	3.33333	3.06667	NCUST
Female	Rural	22	3	3	3	3	3	3	3	3	3	3	1	1	1	1	1	1	1	1	1	1	1	Graduate	3	3	1	1	2.33333	NCUST
Male	Urban	22	3	2	4	4	3	4	3	3	4	3	4	3	4	3	4	3	4	3	4	3	4	Graduate	3.2	3.4	3.6	3.5	3.4	NCUST
Male	Urban	22	5	5	5	5	5	3	3	3	3	3	1	1	1	1	1	1	1	1	1	1	1	Graduate	5	3	1	1	3	NCUST
Female	Rural	22	4	4	4	4	4	4	4	4	4	4	2	2	1	1	1	1	1	1	1	1	1	Graduate	4	4	1.4	1	3.13333	NCUST
Male	Rural	22	4	4	4	4	4	4	4	4	4	4	2	3	2	3	3	2	2	3	3	3	2	Undergraduate	4	4	2.6	2.5	3.53333	NCUST
Male	Rural	22	4	4	4	4	4	3	3	3	2	2	2	2	2	2	1	2	1	1	1	2	2	Graduate	4	2.6	1.8	1.5	2.8	NCUST
Female	Urban	22	4	3	3	4	3	3	3	3	2	3	2	2	2	1	1	2	2	1	1	1	3	Graduate	3.4	2.8	1.6	1.66667	2.6	NCUST
Male	Urban	22	3	3	3	3	3	3	3	3	3	3	3	3	3	3	3	4	4	4	4	4	4	Undergraduate	3	3	3	4	3	NCUST
Male	Rural	22	2	2	2	2	2	2	2	2	2	2	2	2	2	2	2	2	2	2	2	2	2	Undergraduate	2	2	2	2	2	NCUST
Male	Rural	22	3	3	3	4	3	3	3	3	3	4	3	3	3	2	3	3	3	1	3	2	2	Undergraduate	3.2	3.2	2.8	2.33333	3.06667	NCUST
Female	Rural	22	3	3	3	3	3	3	3	3	3	3	2	1	1	1	1	2	2	2	2	2	2	Graduate	3	3	1.2	2	2.4	NCUST
Male	Rural	22	3	3	3	3	3	3	3	3	3	3	3	3	3	3	3	2	2	2	2	2	3	Graduate	3	3	3	2.16667	3	NCUST
Male	Rural	22	5	2	3	2	2	3	2	2	3	2	2	4	2	4	2	2	4	2	2	4	2	Undergraduate	2.8	2.4	2.8	2.66667	2.66667	NCUST
Male	Rural	22	3	3	4	5	5	4	5	4	3	4	3	3	3	3	3	3	4	4	4	4	4	Undergraduate	4	4	3	3.83333	3.66667	NCUST
Female	Rural	22	1	1	1	1	1	1	1	1	1	1	1	1	1	1	1	2	2	2	2	2	2	Undergraduate	1	1	1	2	1	NCUST
Male	Rural	22	1	1	1	1	1	1	1	1	1	1	2	2	2	2	2	3	3	3	3	3	3	Undergraduate	1	1	2	3	1.33333	NCUST
Male	Rural	22	4	4	4	4	4	4	4	4	4	4	4	4	4	4	4	4	4	4	4	4	4	Undergraduate	4	4	4	4	4	NCUST
Male	Rural	22	2	2	3	2	2	2	3	2	2	3	2	2	3	2	3	4	5	4	3	5	4	Undergraduate	2.2	2.4	2.4	4.16667	2.33333	NCUST
Male	Rural	23	3	2	3	3	3	3	2	2	3	2	2	2	2	1	2	2	1	2	1	2	1	Graduate	2.8	2.4	1.8	1.5	2.33333	NCUST
Male	Rural	23	3	4	4	4	4	4	3	4	4	3	3	4	2	3	2	3	4	4	3	3	4	Undergraduate	3.8	3.6	2.8	3.5	3.4	NCUST
Male	Rural	23	4	4	4	4	4	5	5	5	5	5	5	5	1	1	1	1	1	1	1	1	1	Graduate	4	5	2.6	1	3.86667	Others
Male	Rural	23	3	3	5	5	4	3	3	3	3	4	2	2	1	1	1	1	1	1	1	1	1	Graduate	4	3.2	1.4	1	2.86667	NCUST
Female	Rural	23	2	3	4	2	4	3	3	3	4	5	5	3	2	3	2	2	2	3	4	3	2	Graduate	3	3.6	3	2.66667	3.2	NCUST
Male	Rural	23	3	4	4	4	4	1	1	1	1	3	1	1	1	1	1	1	1	1	1	1	3	Graduate	3.8	1.4	1	1.33333	2.06667	NCUST
Male	Urban	23	3	3	3	3	3	5	3	3	3	3	3	3	3	3	3	3	3	2	3	2	3	Undergraduate	3	3.4	3	2.66667	3.13333	NCUST
Male	Rural	23	4	4	3	3	4	3	3	3	3	3	3	3	3	3	3	3	3	3	3	3	3	Undergraduate	3.6	3	3	3	3.2	NCUST
Male	Rural	23	1	1	1	1	1	1	1	1	1	1	1	1	1	1	1	1	1	1	1	1	1	Undergraduate	1	1	1	1	1	NCUST
Male	Urban	23	3	3	2	4	3	3	3	3	3	3	3	3	3	3	3	2	3	3	2	3	3	Undergraduate	3	3	3	2.66667	3	NCUST
Male	Rural	23	4	4	4	4	4	4	4	5	4	2	4	4	4	3	3	4	4	4	4	4	4	Graduate	4	3.8	3.6	4	3.8	Others
Female	Rural	23	4	4	2	3	3	3	3	3	4	2	4	2	3	3	4	2	4	4	2	2	3	Graduate	3.2	3	3.2	2.83333	3.13333	NCUST
Male	Rural	24	4	2	4	3	4	3	4	4	3	4	4	2	2	2	2	2	2	2	2	2	2	Graduate	3.4	3.6	2.4	2	3.13333	NCUST
Male	Rural	24	2	2	1	2	4	2	2	2	2	2	2	2	2	2	2	2	2	2	2	1	2	Graduate	2.2	2	2	1.83333	2.06667	NCUST
Male	Rural	24	3	4	3	4	4	4	3	4	4	3	4	5	4	3	5	5	4	5	4	5	4	Graduate	3.6	3.6	4.2	4.5	3.8	NCUST
Male	Rural	25	3	3	3	3	3	3	3	3	3	3	3	3	3	3	3	3	3	3	3	3	3	Graduate	3	3	3	3	3	NCUST
Female	Rural	29	2	2	4	5	4	4	4	5	4	4	4	3	2	2	2	2	2	2	4	4	4	Graduate	3.4	4.2	2.6	3	3.4	NCUST
